# Supplementary material for: County-Wide Mortality Assessments Attributable to PM2.5 Emissions from Coal Consumption in Taiwan
Source: MDPI journal article supplement (doi:10.3390/ijerph19031599), 2022-01-30
Supplement: s1 [file s1]

**Table S1.** Disease-specific population attributable fraction for adult death and pre-mature death due to PM<sub>2.5</sub> in different cities/counties, Taiwan

| City/County     | IHD            | Stroke        | LC            | COPD          | Overall PAF   |
|-----------------|----------------|---------------|---------------|---------------|---------------|
| Taipei City     | 14.0% (20.7%)* | 21.8% (34.0%) | 13.9% (13.9%) | 11.4% (11.3%) | 16.1% (21.4%) |
| Taichung City   | 18.5% (26.3%)  | 29.0% (41.9%) | 17.9% (17.8%) | 14.6% (14.5%) | 21.1% (27.0%) |
| Tainan City     | 19.8% (29.1%)  | 31.1% (44.5%) | 19.6% (19.6%) | 16.0% (15.6%) | 22.9% (29.7%) |
| Kaohsiung City  | 22.6% (31.9%)  | 35.6% (49.2%) | 22.2% (22.2%) | 17.9% (17.9%) | 25.8% (32.1%) |
| Keelung City    | 12.3% (17.6%)  | 20.5% (30.4%) | 11.8% (11.7%) | 10.0% (9.9%)  | 14.6% (19.1%) |
| Hsinchu City    | 16.3% (24.2%)  | 25.2% (37.3%) | 16.0% (16.0%) | 12.9% (13.2%) | 18.9% (24.9%) |
| Chiayi City     | 22.7% (31.5%)  | 33.6% (49.5%) | 22.3% (22.3%) | 18.6% (18.3%) | 25.3% (31.3%) |
| New Taipei City | 14.6% (20.8%)  | 23.5% (34.3%) | 13.9% (13.9%) | 11.2% (11.5%) | 16.7% (21.3%) |
| Taoyuan City    | 15.0% (21.6%)  | 23.7% (35.2%) | 14.6% (14.6%) | 12.1% (12.1%) | 17.7% (23.5%) |
| Hsinchu County  | 15.1% (22.9%)  | 24.2% (36.5%) | 14.5% (14.6%) | 11.8% (12.0%) | 18.3% (26.9%) |
| Ilan County     | 10.6% (16.5%)  | 17.7% (26.9%) | 10.6% (10.5%) | 8.7% (8.6%)   | 12.7% (17.9%) |
| Miaoli County   | 14.7% (22.2%)  | 23.2% (35.5%) | 14.8% (14.9%) | 12.6% (12.1%) | 17.5% (23.9%) |
| Changhua County | 18.0% (26.7%)  | 28.9% (42.0%) | 18.2% (18.2%) | 14.8% (15.0%) | 20.8% (28.0%) |
| Nantou County   | 19.3% (27.1%)  | 30.1% (42.3%) | 18.9% (18.8%) | 15.4% (15.4%) | 21.9% (28.7%) |
| Yunlin County   | 18.2% (26.9%)  | 29.3% (42.2%) | 18.2% (18.2%) | 14.6% (14.7%) | 21.0% (27.7%) |
| Chiayi County   | 18.8% (28.1%)  | 28.8% (44.3%) | 19.0% (19.1%) | 15.6% (15.8%) | 21.4% (27.1%) |
| Pingtung County | 17.7% (25.6%)  | 28.1% (40.4%) | 17.2% (17.1%) | 13.6% (14.0%) | 20.6% (26.8%) |
| Hualian County  | 11.1% (16.7%)  | 19.5% (28.3%) | 10.9% (10.9%) | 9.0% (8.9%)   | 14.1% (19.5%) |
| Taitung County  | 9.3% (12.3%)   | 13.2% (20.1%) | 7.5% (7.5%)   | 6.2% (6.4%)   | 9.6% (12.9%)  |
| Taiwan          | 16.9% (24.2%)  | 26.7% (39.0%) | 16.7% (16.8%) | 13.7% (14.1%) | 19.6% (25.5%) |

Abbreviation: PAF: population attributable fraction, IHD: Ischemic Heart Disease, LC: Lung Cancer, COPD: Chronic Obstruct Pulmonary Disease

\*Data is shown as disease-specific PAF estimates for adult death (pre-mature death); Unit in percentage.
