# Supplementary material for: County-Wide Mortality Assessments Attributable to PM2.5 Emissions from Coal Consumption in Taiwan
Source: MDPI journal article supplement (doi:10.3390/ijerph19031599), 2022-01-30
Supplement: s1 [file s1]

**Table S4.** Disease-specific pre-mature deaths attributable to ambient PM<sub>2.5</sub> in different cities/counties, Taiwan

| City/County     | IHD                 | Stroke                 | LC                  | COPD             | Total Death            |
|-----------------|---------------------|------------------------|---------------------|------------------|------------------------|
|                 | n (95%CI)           | n (95%CI)              | n (95%CI)           | n (95%CI)        | n (95%CI)              |
| Taipei City     | 57.3 (46.8~67.8)    | 89.1 (78.1~100.5)      | 50.0 (42.8~56.6)    | 4.9 (1.8~8.6)    | 200.9 (182.4~220.9)    |
| Taichung City   | 62.0 (51.8~72.9)    | 127.0 (112.5~140.4)    | 71.1 (62.6~78.9)    | 7.8 (3.6~12.4)   | 268.0 (247.8~287.7)    |
| Tainan City     | 51.8 (43.5~59.3)    | 119.3 (104.7~132.4)    | 62.9 (55.4~69.9)    | 7.0 (2.3~12.6)   | 241.1 (222.3~258.5)    |
| Kaohsiung City  | 102.0 (86.0~116.9)  | 181.5 (162.2~199.1)    | 110.5 (96.2~122.8)  | 16.3 (6.8~26.9)  | 410.3 (378.9~439.4)    |
| Keelung City    | 9.5 (7.8~11.1)      | 17.3 (15.1~19.5)       | 7.6 (6.6~8.5)       | 1.0 (0.3~1.7)    | 35.5 (32.5~38.5)       |
| Hsinchu City    | 10.9 (8.8~12.8)     | 16.4 (14.0~18.5)       | 9.1 (8.1~10.1)      | 0.1 (0.0~0.3)    | 36.5 (33.1~39.7)       |
| Chiayi City     | 8.2 (6.8~9.7)       | 12.9 (11.4~14.3)       | 8.3 (7.1~9.2)       | 2.0 (0.8~3.3)    | 31.3 (28.8~34.0)       |
| New Taipei City | 83.2 (68.2~98.5)    | 150.4 (131.3~167.1)    | 87.8 (76.6~99.0)    | 9.6 (3.7~15.7)   | 331.0 (303.6~358.0)    |
| Taoyuan City    | 34.4 (28.4~40.5)    | 90.2 (79.6~100.5)      | 39.4 (34.6~44.1)    | 3.4 (1.6~5.3)    | 167.4 (153.1~180.5)    |
| Hsinchu County  | 13.1 (10.8~15.3)    | 32.2 (38.4~36.0)       | 6.6 (5.6~7.4)       | 0.5 (0.1~1.0)    | 52.3 (47.3~57.1)       |
| Ilan County     | 8.3 (6.7~9.7)       | 21.8 (19.2~24.4)       | 8.0 (7.0~8.9)       | 0.9 (0.2~1.8)    | 39.0 (35.8~42.4)       |
| Miaoli County   | 15.3 (12.1~18.4)    | 30.2 (26.5~33.6)       | 12.3 (10.8~13.8)    | 1.2 (0.2~2.3)    | 59.0 (54.0~64.0)       |
| Changhua County | 35.2 (29.1~41.6)    | 68.0 (59.5~75.9)       | 32.8 (28.4~37.0)    | 3.9 (1.3~6.9)    | 139.9 (127.0~151.3)    |
| Nantou County   | 17.6 (14.3~20.6)    | 39.3 (34.7~44.2)       | 17.3 (14.8~19.4)    | 2.9 (1.0~5.0)    | 77.2 (70.8~84.0)       |
| Yunlin County   | 25.8 (21.4~30.4)    | 50.2 (44.3~56.0)       | 27.7 (23.8~31.7)    | 2.3 (0.7~4.2)    | 106.0 (96.2~115.9)     |
| Chiayi County   | 18.3 (15.3~21.1)    | 28.4 (24.8~31.7)       | 21.7 (18.8~24.6)    | 3.6 (1.3~6.4)    | 72.0 (65.6~78.1)       |
| Pingtung County | 31.7 (24.4~39.8)    | 66.6 (53.3~78.7)       | 26.0 (20.7~31.6)    | 6.7 (2.7~11.5)   | 131.1 (107.0~155.0)    |
| Hualian County  | 6.7 (5.4~8.0)       | 26.1 (22.5~29.4)       | 7.4 (6.4~8.3)       | 0.9 (0.3~1.6)    | 41.0 (37.1~44.9)       |
| Taitung County  | 11.5 (9.4~13.5)     | 7.8 (6.7~8.9)          | 2.8 (2.4~3.2)       | 0.2 (0.0~0.4)    | 22.3 (20.0~24.7)       |
| Taiwan          | 602.6 (571.3~632.6) | 1174.8 (1134.0~1214.6) | 609.0 (584.3~633.3) | 75.4 (59.4~91.8) | 2461.7 (2401.1~2529.1) |

Abbreviation: IHD: Ischemic Heart Disease, LC: Lung Cancer, COPD: Chronic Obstruct Pulmonary Disease, CI: Confidence Interval; Unit in deaths/year.
