# Supplementary material for: County-Wide Mortality Assessments Attributable to PM2.5 Emissions from Coal Consumption in Taiwan
Source: MDPI journal article supplement (doi:10.3390/ijerph19031599), 2022-01-30
Supplement: s1 [file s1]

**Table S3.** Disease-specific deaths attributable to PM<sub>2.5</sub> from all coal-fired plants in different cities/counties, Taiwan

|                 | IHD              | Stroke              | LC               | COPD             | Total Death         |
|-----------------|------------------|---------------------|------------------|------------------|---------------------|
| City/County     | n (95%CI)        | n (95%CI)           | n (95%CI)        | n (95%CI)        | n (95%CI)           |
| Taipei City     | 4.4 (3.4~5.5)    | 7.6 (6.0~9.2)       | 4.2 (3.5~5.0)    | 1.8 (0.4~3.5)    | 18.1 (14.5~21.7)    |
| Taichung City   | 7.0 (5.6~8.6)    | 14.1 (11.3~16.6)    | 7.7 (6.4~9.2)    | 3.9 (0.9~6.9)    | 32.7 (26.6~38.8)    |
| Tainan City     | 8.2 (6.7~9.8)    | 16.9 (14.1~19.5)    | 9.2 (7.8~10.6)   | 4.9 (1.5~8.3)    | 39.1 (33.1~45.4)    |
| Kaohsiung City  | 14.5 (12.3~16.7) | 23.0 (20.5~25.5)    | 13.8 (12.4~15.3) | 6.5 (2.4~10.6)   | 57.8 (51.6~63.7)    |
| Keelung City    | 1.0 (0.7~1.2)    | 1.8 (1.4~2.2)       | 0.8 (0.6~1.0)    | 0.4 (0.1~0.7)    | 3.9 (3.1~4.8)       |
| Hsinchu City    | 1.2 (0.9~1.5)    | 1.8 (1.4~2.3)       | 0.9 (0.7~1.1)    | 0.3 (0.1~0.6)    | 4.2 (3.3~5.2)       |
| Chiayi City     | 1.0 (0.8~1.3)    | 1.9 (1.5~2.4)       | 1.0 (0.8~1.2)    | 0.7 (0.2~1.2)    | 4.6 (3.6~5.7)       |
| New Taipei City | 7.9 (6.3~9.7)    | 13.8 (11.3~16.6)    | 8.2 (6.7~9.7)    | 3.3 (1.1~5.9)    | 33.2 (27.4~39.7)    |
| Taoyuan City    | 4.3 (3.3~5.2)    | 11.0 (9.0~13.3)     | 5.2 (4.2~6.2)    | 2.3 (0.6~4.3)    | 22.7 (18.5~27.6)    |
| Hsinchu County  | 1.4 (1.2~1.7)    | 3.1 (2.6~3.6)       | 0.9 (0.7~1.0)    | 0.5 (0.1~1.0)    | 5.9 (5.0~6.8)       |
| Ilan County     | 0.7 (0.4~1.1)    | 1.5 (0.8~2.2)       | 0.7 (0.4~1.0)    | 0.4 (0.1~0.7)    | 3.3 (1.8~4.8)       |
| Miaoli County   | 5.1 (2.5~7.9)    | 11.3 (5.4~17.6)     | 3.9 (1.9~5.9)    | 3.0 (0.7~6.2)    | 23.3 (11.1~35.0)    |
| Changhua County | 5.2 (4.3~6.2)    | 8.8 (7.4~10.2)      | 5.2 (4.5~6.0)    | 2.8 (0.8~4.9)    | 22.1 (18.8~25.9)    |
| Nantou County   | 6.1 (3.2~9.2)    | 12.3 (6.5~18.6)     | 5.8 (3.0~8.7)    | 4.5 (1.2~8.9)    | 28.7 (14.5~43.9)    |
| Yunlin County   | 5.7 (3.9~7.6)    | 9.7 (6.8~12.8)      | 6.1 (4.3~7.8)    | 2.7 (0.8~4.9)    | 24.2 (17.0~30.9)    |
| Chiayi County   | 3.3 (2.7~3.9)    | 6.1 (5.1~7.1)       | 3.8 (3.3~4.3)    | 1.9 (0.7~3.2)    | 15.1 (13.0~17.4)    |
| Pingtung County | 3.8 (2.6~5.2)    | 7.5 (5.1~10.2)      | 3.1 (2.1~4.2)    | 1.9 (0.7~3.4)    | 16.3 (11.1~21.9)    |
| Hualian County  | 0.6 (0.4~0.7)    | 1.7 (1.4~2.1)       | 0.6 (0.5~0.8)    | 0.3 (0.1~0.6)    | 3.2 (2.5~4.0)       |
| Taitung County  | 0.4 (0.3~0.5)    | 0.4 (0.3~0.5)       | 0.2 (0.1~0.2)    | 0.1 (0.0~0.2)    | 1.0 (0.8~1.3)       |
| Taiwan          | 81.7 (75.3~87.9) | 154.4 (143.2~166.0) | 81.4 (76.4~86.7) | 42.0 (32.5~52.0) | 359.6 (334.8~384.9) |

Abbreviation: IHD: Ischemic Heart Disease, LC: Lung Cancer, COPD: Chronic Obstruct Pulmonary Disease, CI: Confidence Interval; Unit in deaths/year.
