# Supplementary material for: County-Wide Mortality Assessments Attributable to PM2.5 Emissions from Coal Consumption in Taiwan
Source: MDPI journal article supplement (doi:10.3390/ijerph19031599), 2022-01-30
Supplement: s1 [file s1]

**Table S2.** Disease-specific total deaths attributable to ambient PM<sub>2.5</sub> in different cities/counties, Taiwan

|                 | IHD                    | Stroke                 | LC                     | COPD                | Total Death            |
|-----------------|------------------------|------------------------|------------------------|---------------------|------------------------|
| City/County     | n (95%CI)              | n (95%CI)              | n (95%CI)              | n (95%CI)           | n (95%CI)              |
| Taipei City     | 144.8 (116.2~171.4)    | 263.3 (224.9~302.0)    | 137.6 (119.3~155.8)    | 60.5 (15.6~117.7)   | 606.2 (529.7~688.4)    |
| Taichung City   | 143.6 (119.5~164.7)    | 312.2 (270.8~350.9)    | 155.5 (138.2~171.2)    | 81.1 (22.3~150.7)   | 692.3 (612.3~778.3)    |
| Tainan City     | 138.1 (116.8~159.0)    | 310.7 (270.3~349.5)    | 152.3 (135.1~168.4)    | 83.1 (23.2~151.7)   | 684.2 (600.4~768.6)    |
| Kaohsiung City  | 251.4 (214.1~288.4)    | 446.3 (395.1~492.9)    | 235.4 (211.0~257.5)    | 113.3 (41.0~194.1)  | 1046.3 (944.6~1155.9)  |
| Keelung City    | 21.0 (17.5~24.2)       | 41.3 (36.1~46.4)       | 17.4 (15.6~19.3)       | 8.4 (2.8~14.8)      | 88.1 (79.0~97.3)       |
| Hsinchu City    | 28.0 (23.1~32.2)       | 47.0 (40.5~53.4)       | 21.7 (19.3~24.1)       | 7.4 (1.6~14.5)      | 104.1 (93.6~114.6)     |
| Chiayi City     | 18.9 (15.7~21.7)       | 38.6 (33.1~43.7)       | 18.3 (16.3~20.0)       | 13.0 (4.1~22.1)     | 88.7 (78.0~100.4)      |
| New Taipei City | 181.2 (154.4~209.0)    | 337.7 (291.2~379.0)    | 183.9 (164.9~204.7)    | 73.7 (25.8~141.3)   | 776.4 (695.7~869.5)    |
| Taoyuan City    | 80.2 (65.8~94.1)       | 219.0 (188.3~249.2)    | 95.2 (84.1~106.5)      | 42.7 (10.8~82.2)    | 437.1 (384.3~492.6)    |
| Hsinchu County  | 32.6 (26.8~38.0)       | 76.7 (66.0~87.5)       | 19.8 (17.2~22.4)       | 12.2 (3.2~23.6)     | 141.3 (125.8~159.5)    |
| Ilan County     | 24.3 (20.3~28.2)       | 55.1 (48.0~61.9)       | 24.3 (21.3~27.1)       | 12.2 (3.7~23.5)     | 116.0 (102.4~130.6)    |
| Miaoli County   | 41.4 (34.1~48.3)       | 96.2 (83.0~109.9)      | 31.1 (27.8~34.8)       | 25.1 (6.7~47.5)     | 193.7 (168.2~220.8)    |
| Changhua County | 99.7 (81.2~116.5)      | 183.1 (158.9~206.3)    | 98.3 (86.6~110.7)      | 54.5 (16.8~97.7)    | 435.6 (383.3~490.3)    |
| Nantou County   | 44.4 (37.2~51.1)       | 97.4 (84.9~109.6)      | 41.5 (36.8~46.1)       | 33.8 (10.3~60.6)    | 217.1 (186.8~247.2)    |
| Yunlin County   | 72.0 (59.8~84.4)       | 135.2 (116.6~153.1)    | 76.4 (65.9~87.1)       | 33.9 (10.4~60.1)    | 317.4 (279.9~357.1)    |
| Chiayi County   | 53.2 (44.2~61.7)       | 106.5 (91.2~121.2)     | 60.7 (53.9~67.6)       | 32.1 (10.2~56.8)    | 252.4 (221.6~284.2)    |
| Pingtung County | 76.1 (58.5~95.6)       | 160.1 (129.0~190.3)    | 60.6 (48.1~74.2)       | 36.9 (13.7~65.0)    | 333.7 (265.2~400.4)    |
| Hualian County  | 16.0 (13.1~18.9)       | 51.6 (45.0~58.0)       | 17.5 (15.4~19.5)       | 8.6 (2.3~15.6)      | 93.7 (83.7~104.2)      |
| Taitung County  | 17.0 (14.4~19.6)       | 19.0 (16.6~21.3)       | 8.2 (7.2~9.3)          | 4.4 (1.2~8.5)       | 48.6 (43.4~54.0)       |
| Taiwan          | 1483.8 (1413.7~1558.8) | 2996.8 (2886.8~3108.5) | 1455.6 (1404.3~1504.2) | 736.7 (564.6~908.7) | 6672.9 (6441.9~6921.6) |

Abbreviation: IHD: Ischemic Heart Disease, LC: Lung Cancer, COPD: Chronic Obstruct Pulmonary Disease, CI: Confidence Interval; Unit in deaths/year.
