# Supplementary material for: County-Wide Mortality Assessments Attributable to PM2.5 Emissions from Coal Consumption in Taiwan
Source: Int J Environ Res Public Health. 2022 Jan 30;19(3):1599. doi: 10.3390/ijerph19031599 (PMC8835574; doi:10.3390/ijerph19031599)
Supplement: Supplementary file 1 [file ijerph-19-01599-s001.zip]

Archive with 6 entries (6 files):
- File S1 Data_Conc+Dist-CP+CHP-revision.xlsx
- File S2 Data_HIA-CP+CHP-revision.xlsx
- Table S1.pdf
- Table S2.pdf
- Table S3.pdf
- Table S4.pdf
