# Supplementary material for: County-Wide Mortality Assessments Attributable to PM2.5 Emissions from Coal Consumption in Taiwan
Source: Int J Environ Res Public Health. 2022 Jan 30;19(3):1599. doi: 10.3390/ijerph19031599 (PMC8835574; doi:10.3390/ijerph19031599)
Supplement: Supplementary file 1 [file ijerph-19-01599-s001.zip › File S1 Data_Conc+Dist-CP+CHP-revision.xlsx]

## Sheet: PM25
					stationID	EPA001	EPA002	EPA003	EPA004	EPA005	EPA006	EPA007	EPA008	EPA009	EPA010	EPA011	EPA012	EPA013	EPA014	EPA015	EPA017	EPA018	EPA019	EPA020	EPA021	EPA022	EPA023	EPA024	EPA025	EPA026	EPA027	EPA028	EPA029	EPA030	EPA031	EPA032	EPA033	EPA034	EPA035	EPA036	EPA037	EPA038	EPA039	EPA040	EPA041	EPA042	EPA043	EPA044	EPA045
					NAME	基隆	汐止	萬里	新店	土城	板橋	新莊	菜寮	林口	淡水	士林	中山	萬華	古亭	松山	桃園	大園	觀音	平鎮	龍潭	湖口	竹東	新竹	頭份	苗栗	三義	豐原	沙鹿	大里	忠明	西屯	彰化	線西	二林	南投	斗六	崙背	新港	朴子	臺西	嘉義	新營	善化	安南
					COUNTY	基隆市	新北市	新北市	新北市	新北市	新北市	新北市	新北市	新北市	新北市	臺北市	臺北市	臺北市	臺北市	臺北市	桃園市	桃園市	桃園市	桃園市	桃園市	新竹縣	新竹縣	新竹市	苗栗縣	苗栗縣	苗栗縣	臺中市	臺中市	臺中市	臺中市	臺中市	彰化縣	彰化縣	彰化縣	南投縣	雲林縣	雲林縣	嘉義縣	嘉義縣	雲林縣	嘉義市	臺南市	臺南市	臺南市
					TM2_X	326641	314649	319536	304294	295618	296293	293643	298528	286891	295286	301889	303121	301256	303445	308382	280729	270361	258351	270698	271862	253905	258993	247177	239737	231788	225536	223774	206205	217233	213527	211073	203377	196036	189902	217961	203604	183615	183185	173110	168718	192875	180167	178008	169896
代碼	C_NO	全名	Boiler Type	TM2_X	TM2_Y	2.7803e+06	2.7732e+06	2.78586e+06	2.76336e+06	2.76392e+06	2.76729e+06	2.77005e+06	2.7735e+06	2.77453e+06	2.78407e+06	2.77761e+06	2.77279e+06	2.77102e+06	2.76816e+06	2.77144e+06	2.76533e+06	2.77248e+06	2.76971e+06	2.76072e+06	2.75072e+06	2.75472e+06	2.73705e+06	2.74425e+06	2.73222e+06	2.71764e+06	2.69746e+06	2.68346e+06	2.68008e+06	2.66609e+06	2.6719e+06	2.67304e+06	2.66241e+06	2.66971e+06	2.64686e+06	2.64542e+06	2.62319e+06	2.62832e+06	2.60588e+06	2.59601e+06	2.62397e+06	2.59564e+06	2.57829e+06	2.5572e+06	2.54985e+06
CP01	F1700736	林口電廠(121.2994,25.11971)	超超臨界鍋爐 (ultra-supercritical boiler)	280192	2.77907e+06	0.167314	0.214703	0.184652	0.392716	0.337075	0.341244	0.150143	0.126322	0.231344	0.164009	0.134275	0.12502	0.0972431	0.238394	0.214411	0.15352	0.277719	0.221682	0.253177	0.275121	0.140073	0.156894	0.130301	0.173888	0.268386	0.0954399	0.0522876	0.0355777	0.0540125	0.0508297	0.0481824	0.0516681	0.0736493	0.0661974	0.048197	0.123316	0.0684091	0.0627541	0.062839	0.0995818	0.0643293	0.0711302	0.053378	0.0496696
CP02	L0200473	台中電廠(120.2994,25.11971)	超臨界鍋爐 (supercritical boiler)	196482	2.67927e+06	0.396468	0.349612	0.460295	1.15571	0.718514	0.86485	0.358511	0.292534	0.162285	0.251385	0.278515	0.28613	0.225234	0.535718	0.340928	0.414575	0.587474	0.46038	0.496032	1.1818	0.427433	0.552416	0.557902	0.852083	3.15019	1.08386	0.811378	0.858959	1.37772	1.08293	1.06947	1.20023	1.505	1.19946	1.38322	2.85864	1.17228	1.1384	1.20425	1.1091	1.28308	1.36026	1.10455	0.990077
CP03	P5801719	麥寮汽電(120.2033,23.81064)	超臨界鍋爐 (supercritical boiler)	168823	2.63428e+06	0.0344123	0.0299908	0.0341996	0.0857396	0.0577666	0.0610322	0.0303207	0.0246486	0.0176226	0.0219019	0.0263991	0.0240439	0.0199196	0.0428208	0.0303134	0.0327054	0.0472018	0.0492066	0.0440421	0.132378	0.0441716	0.0484974	0.0569633	0.0753823	0.179572	0.105164	0.0805203	0.0453702	0.0804395	0.0667001	0.0614355	0.0526895	0.070374	0.0878599	0.0972422	0.163602	0.131804	0.129461	0.144713	0.170922	0.129469	0.1639	0.128714	0.126325
CP04	S3200688	興達電廠(120.2002,22.8492)	超臨界鍋爐 (supercritical boiler)	167918	2.52781e+06	0.0665653	0.0358142	0.0529055	0.106507	0.0769969	0.0978573	0.0384657	0.0319538	0.0219769	0.0257163	0.0309681	0.0298916	0.0279227	0.0583882	0.0419437	0.0353995	0.0799401	0.0722706	0.0478217	0.163277	0.05262	0.055495	0.0715323	0.0937466	0.262029	0.179739	0.172699	0.0530724	0.0890024	0.0680572	0.0657775	0.0600001	0.0764166	0.105508	0.131561	0.267517	0.129304	0.195932	0.200681	0.114057	0.192486	0.280593	0.356741	0.394408
CP05	U0100258	和平電廠(121.7628,24.3075)	次臨界鍋爐 (subcritical boiler)	327424	2.68929e+06	0.134736	0.0896178	0.0740629	0.224151	0.11967	0.124271	0.0741655	0.0737121	0.04903	0.0683137	0.0676319	0.0770944	0.0753594	0.114237	0.123247	0.0551189	0.0494366	0.0368566	0.0465657	0.150927	0.0639425	0.0488727	0.0411957	0.0539588	0.0531336	0.0204175	0.0178201	0.00746643	0.0149217	0.0149197	0.00999052	0.00682647	0.0100741	0.0102465	0.0149008	0.0153588	0.00870735	0.0107797	0.0100077	0.00733891	0.0096009	0.0129523	0.0096765	0.00847127
CHP01	F0701702	南亞塑膠工業股份有限公司樹林廠		291366	2762741	0.0197428	0.0227474	0.0206219	0.077289	0.0763497	0.0657498	0.0219832	0.0118991	0.0130371	0.0127772	0.0119628	0.012901	0.0099123	0.0300912	0.0234196	0.0248148	0.0142562	0.0130719	0.0283254	0.0634487	0.0101145	0.0264906	0.0134746	0.0217972	0.0446194	0.0111409	0.00653282	0.0046738	0.00629934	0.00556709	0.00504806	0.00639139	0.00875417	0.0079232	0.00557492	0.0125401	0.00760623	0.00729188	0.0069647	0.00949822	0.0075171	0.0079212	0.00606401	0.00530657
CHP02	F1600491	南亞塑膠工業股份有限公司林口二廠		291100	2770952	0.0129298	0.0173593	0.0155664	0.0355492	0.0327911	0.0484569	0.0381534	0.0178025	0.0250228	0.0132768	0.0124304	0.0132884	0.00918786	0.0220803	0.0197759	0.023922	0.014808	0.016137	0.0251414	0.0269815	0.00890767	0.0149488	0.0115792	0.0150401	0.0216424	0.00687622	0.00428786	0.00302119	0.00367275	0.00332786	0.00318236	0.00392608	0.00591943	0.00511178	0.00328638	0.00713189	0.00463818	0.0042454	0.00425915	0.00674825	0.00441566	0.00461981	0.00347806	0.00329797
CHP03	H4601227	義芳化學工業股份有限公司桃園廠		276497	2778341	0.0232476	0.0300723	0.0268983	0.0469681	0.0469684	0.0442857	0.0292191	0.0224374	0.0317673	0.0296241	0.0244198	0.0213464	0.0159045	0.0333328	0.0319921	0.0345424	0.0730506	0.0561502	0.0465944	0.0414604	0.0307353	0.0251895	0.027325	0.0311228	0.0337557	0.0176368	0.0104922	0.00695617	0.00913088	0.00859727	0.00835819	0.00875785	0.0135238	0.0115154	0.0089517	0.0174845	0.0110748	0.010062	0.00979651	0.0188371	0.0100511	0.0104904	0.00815909	0.00822824
CHP04	H4601398	南亞塑膠工業股份有限公司錦興廠		278563	2772270	0.0238368	0.0291144	0.0239062	0.0534812	0.0568913	0.0506461	0.0336198	0.0214475	0.0495503	0.026549	0.0207672	0.0211052	0.0152002	0.0357062	0.0331441	0.0633815	0.0710908	0.0565203	0.0848831	0.0503883	0.0345174	0.0318459	0.0338236	0.0395366	0.0421218	0.0191135	0.0105555	0.00738333	0.00955101	0.00819428	0.00747394	0.00856268	0.013282	0.0111399	0.00878616	0.0171232	0.0105757	0.00941273	0.0094043	0.0173932	0.00956745	0.00999092	0.00771409	0.00750168
CHP05	H4700645	正隆股份有限公司大園廠		268147	2773464	0.00482199	0.00585627	0.00556007	0.00869618	0.0088561	0.00825132	0.00617379	0.00439144	0.00445062	0.00577883	0.00516983	0.00443389	0.00316847	0.00630782	0.00609781	0.00621633	0.0418255	0.0286766	0.0116811	0.00995845	0.0112358	0.00683564	0.0085907	0.00868244	0.00851106	0.00571209	0.0034446	0.00216707	0.00277422	0.00234533	0.00221291	0.00242725	0.00381794	0.00342607	0.00240791	0.00464927	0.00315166	0.00294922	0.0030361	0.00524073	0.00285521	0.00313295	0.00244676	0.00238317
CHP06	H4702336	大園汽電共生股份有限公司		268147	2773464	0.0100804	0.0123031	0.0119106	0.0179709	0.0176892	0.016374	0.0116103	0.00843054	0.00793981	0.0110272	0.0102214	0.00866034	0.00627328	0.0129899	0.0126632	0.0105809	0.0388842	0.0380725	0.0191613	0.0197093	0.0170688	0.0132435	0.0142837	0.0161773	0.0172385	0.0110946	0.00681484	0.00416704	0.00546459	0.00479028	0.00441572	0.005001	0.00737575	0.00682354	0.00483991	0.0101307	0.00657101	0.006031	0.00619304	0.0103674	0.00596673	0.00655377	0.00517497	0.00507465
CHP07	H4810851	華亞汽電股份有限公司華亞汽電廠		287615	2769685	0.0356985	0.0466468	0.0398615	0.110193	0.107254	0.0977741	0.0637535	0.0309522	0.0799189	0.0342628	0.0269299	0.0307689	0.0219355	0.0632675	0.0542253	0.112579	0.0412877	0.0451185	0.093616	0.0880861	0.0279438	0.0485012	0.0321619	0.0488811	0.0744834	0.021646	0.0114641	0.00888911	0.0110301	0.0101483	0.0093087	0.0110483	0.0164944	0.0137373	0.010466	0.0225776	0.0131995	0.0117793	0.0121778	0.0191973	0.012532	0.0126477	0.00989044	0.00929235
CHP08	H5200215	永豐餘工業用紙股份有限公司新屋廠		254173	2763278	0.020648	0.0234874	0.0227532	0.0410511	0.0390756	0.0369403	0.0229283	0.0176531	0.0127697	0.0223436	0.0197544	0.0183385	0.0143406	0.027822	0.0251093	0.0254901	0.0607967	0.104988	0.0449916	0.0463026	0.0649111	0.0435184	0.0437618	0.05942	0.0685252	0.0324657	0.0220981	0.0144854	0.017753	0.0155938	0.0150288	0.017313	0.0230536	0.0196857	0.0155201	0.0317005	0.0180906	0.0161808	0.0169156	0.0309515	0.0176113	0.0189648	0.0148938	0.0141337
CHP09	L8801052	廣源造紙股份有限公司台中廠		212381	2700901	0.000686227	0.000816656	0.000795748	0.00187272	0.00226821	0.00211036	0.00124092	0.000878523	0.000710415	0.000920034	0.000781933	0.000749817	0.000616611	0.00133858	0.000902292	0.00149945	0.00282525	0.00312337	0.00215744	0.00322992	0.00230067	0.00304264	0.00281853	0.00576444	0.0110015	0.00987876	0.0064203	0.00916971	0.00892491	0.00752928	0.00752358	0.00734889	0.0102789	0.00739115	0.00686027	0.00948074	0.00558585	0.004603	0.0044587	0.00604938	0.00503772	0.00435111	0.00328608	0.00332085
CHP10	L9200693	正隆股份有限公司后里分公司		222286	2686841	0.0104846	0.014642	0.0128163	0.0402123	0.0409085	0.0372835	0.0171533	0.0121819	0.0104028	0.0115333	0.0110298	0.0118452	0.00991756	0.0243065	0.0151463	0.0199915	0.0293675	0.0296992	0.0269446	0.0673162	0.0282399	0.0368901	0.0367377	0.0847675	0.324487	0.25456	0.644424	0.0649785	0.229554	0.173834	0.147474	0.0827487	0.0655811	0.0807371	0.246594	0.280473	0.0919022	0.0908414	0.0870872	0.0517227	0.120592	0.0994195	0.0735304	0.0737055
CHP11	R0500400	東展興業股份有限公司		181706	2556541	0.0018947	0.00143508	0.00115865	0.00166825	0.00174983	0.00168527	0.00117728	0.000859346	0.000721778	0.00064264	0.000944164	0.000824061	0.000694498	0.00136928	0.00106787	0.00096316	0.00198401	0.00177268	0.00118786	0.00336992	0.0013635	0.00169034	0.00173745	0.00308582	0.00368279	0.00304496	0.0029049	0.00242684	0.00269054	0.0021515	0.00222826	0.00193168	0.00324784	0.00441377	0.00414075	0.00991668	0.00669711	0.0104499	0.0175929	0.00772904	0.0151714	0.0278488	0.116475	0.0350436
CHP12	R9702160	台灣汽電共生股份有限公司官田廠		180257	2567797	0.00492903	0.00577793	0.00521431	0.00766394	0.00695367	0.00646648	0.00437556	0.00312946	0.00309568	0.00223758	0.00321624	0.00308854	0.00262718	0.00545945	0.00457976	0.00395526	0.0062432	0.00625037	0.00546406	0.0127376	0.00528238	0.00656002	0.00642894	0.0120807	0.0151968	0.0115415	0.0122144	0.00799749	0.00915278	0.00719913	0.00810351	0.00733593	0.0118508	0.0160047	0.0162097	0.0389086	0.0237612	0.0349167	0.0480687	0.0251116	0.0557992	0.0796461	0.101666	0.0889569
CHP13	E5600841	中國鋼鐵股份有限公司		181739	2493493	0.00134777	0.00129494	0.00179406	0.00365459	0.00321538	0.00261412	0.00211101	0.00135605	0.00126852	0.00196799	0.0014426	0.00104703	0.00106046	0.00178175	0.00228491	0.00334056	0.00493756	0.00539071	0.00282228	0.00398423	0.00367873	0.00477049	0.00580354	0.00740768	0.0120099	0.0052842	0.00649697	0.0029715	0.00458296	0.00361159	0.00324599	0.00355682	0.00641514	0.00697396	0.00498964	0.00992035	0.00761787	0.010502	0.0125885	0.0101954	0.00938267	0.0141256	0.0209315	0.0252035
CHP14	S1900658	台灣苯乙烯工業股份有限公司高雄廠		189002	2490082	0.000113921	0.000102605	0.000113353	0.000245728	0.00021689	0.000213226	0.000170037	0.000103602	0.000101407	0.000117153	0.000108266	7.4919e-05	7.93156e-05	0.000126357	0.000136736	0.00028138	0.000405565	0.000401731	0.000277212	0.00046297	0.000269091	0.000400203	0.000492003	0.000517619	0.000865236	0.000387729	0.00048172	0.000263002	0.000419448	0.000361375	0.000239431	0.000250509	0.000431857	0.000561071	0.000358317	0.000643466	0.000621439	0.00085955	0.00101671	0.0007163	0.000657711	0.0013212	0.00198541	0.00253984
CHP15	S1900685	台灣塑膠工業股份有限公司林園廠		189335	2489871	0.000320529	0.00029757	0.000324065	0.000691612	0.0006059	0.000592664	0.00046052	0.000289231	0.000276302	0.000318869	0.000320085	0.00020869	0.000217696	0.000359466	0.000392101	0.00077059	0.00114582	0.00111919	0.000789482	0.0012658	0.000756662	0.00110644	0.00135455	0.00143363	0.00239975	0.00103079	0.00126897	0.000694789	0.00109681	0.000966173	0.00063584	0.000680513	0.00119436	0.00148165	0.000965256	0.00173094	0.00162876	0.00220761	0.00280966	0.00191641	0.00180061	0.00330348	0.00512439	0.00643566
CHP16	S2001314	長春石油化學股份有限公司-大發廠		190854	2497075	0.000389535	0.000182094	0.000286818	0.000599111	0.000494904	0.00048423	0.000466594	0.000265054	0.000189706	0.00035785	0.000286803	0.000230487	0.000203476	0.000251587	0.000399664	0.000613442	0.000840158	0.00082423	0.000510234	0.000702082	0.000593685	0.00101745	0.000990672	0.00115485	0.00196749	0.00103144	0.00114014	0.000566476	0.000875033	0.000655084	0.000570817	0.000589009	0.000942846	0.00124041	0.0010774	0.00155792	0.00144804	0.00230529	0.00301354	0.00199412	0.00165309	0.00374693	0.00597848	0.00789541
CHP17	S2005081	長春人造樹脂股份有限公司大發廠		190695	2497322	0.000207065	9.4794e-05	0.000154663	0.000321554	0.000261899	0.000257499	0.000253808	0.000145449	9.85676e-05	0.000198725	0.000155062	0.00012382	0.000115826	0.000135215	0.000215433	0.00033076	0.000463051	0.000465017	0.000269715	0.000366022	0.000320417	0.000545291	0.000554491	0.00065368	0.00111076	0.000526657	0.000576625	0.000293819	0.00048184	0.000349098	0.000314099	0.000305931	0.000493616	0.000673889	0.000555442	0.000833868	0.000757246	0.00120915	0.00148237	0.000994544	0.000830157	0.00197765	0.00294383	0.00388843
CHP18	S2100223	永豐餘造紙股份有限公司-久堂廠		190285	2506982	0.000980454	0.000421567	0.000652267	0.000847931	0.000875297	0.000907197	0.000660985	0.0003781	0.000259196	0.000600815	0.000355742	0.000337	0.000337917	0.000535398	0.000469025	0.000969173	0.00108735	0.00118755	0.000702733	0.00119751	0.000867033	0.0012562	0.00123537	0.00154436	0.00260449	0.00196059	0.00159291	0.000806363	0.00137858	0.000814187	0.000797576	0.000881595	0.00132622	0.00155496	0.00133929	0.00254449	0.00222179	0.00288726	0.00363493	0.00260546	0.00303612	0.00411358	0.00632017	0.00766841
CHP19	S2201109	台灣塑膠工業股份有限公司仁武廠		181505	2511250	0.00318982	0.00172932	0.00271906	0.00350941	0.00278683	0.00284988	0.00268376	0.00168338	0.0011747	0.00264437	0.00194048	0.00139579	0.00143337	0.0026432	0.00192596	0.00262373	0.00591584	0.00631833	0.00266496	0.0047469	0.00366478	0.00407768	0.00488605	0.00657395	0.0098234	0.00748917	0.00771973	0.0032173	0.00595107	0.00382539	0.00407983	0.00403418	0.00662746	0.00818498	0.00673282	0.0152278	0.0110078	0.0156365	0.0197907	0.013516	0.0167188	0.0221207	0.0350448	0.0441384
CHP20	S2300401	中國人造纖維股份有限公司高雄總廠		181813	2514444	0.000451756	0.000289863	0.000448926	0.000540274	0.000442693	0.000446193	0.00049437	0.000288526	0.000199417	0.00050377	0.000351216	0.000248673	0.000232943	0.000411508	0.000298574	0.000432512	0.001026	0.00105044	0.000442698	0.000832137	0.000657096	0.000657924	0.000850602	0.00102716	0.00160278	0.00132298	0.00138383	0.000595107	0.000915882	0.000683999	0.000831464	0.000655052	0.00114261	0.00158758	0.00116803	0.00246986	0.00212305	0.00315916	0.00373265	0.00253589	0.00302586	0.00457015	0.00690116	0.00957281
CHP21	S2300429	國喬石油化學股份有限公司高雄廠		182323	2513515	8.54006e-05	5.69161e-05	8.65535e-05	0.000102034	9.13743e-05	9.23316e-05	0.000101756	5.63995e-05	3.94708e-05	9.56874e-05	6.51439e-05	5.21572e-05	4.48999e-05	7.62603e-05	5.08784e-05	7.96218e-05	0.000171897	0.000192765	8.417e-05	0.000168706	0.000124048	0.000127022	0.000150909	0.000183716	0.000285765	0.000290142	0.000304362	0.000132648	0.000185753	0.000144675	0.000175787	0.000136565	0.000227951	0.000333933	0.000253882	0.000553863	0.000480713	0.000756262	0.000995576	0.000603545	0.000718091	0.00121566	0.00207614	0.00302354
CHP22	J5901658	長春人造樹脂廠股份有限公司新竹廠		251533	2752988	0.00926338	0.00991134	0.00927813	0.0207565	0.019376	0.0183024	0.0112904	0.00833765	0.00559084	0.00967391	0.00862248	0.00862901	0.00682261	0.0132271	0.0106889	0.0128164	0.0300884	0.0439889	0.0273885	0.0285702	0.0846902	0.0337142	0.0595416	0.0502521	0.0503359	0.0215862	0.0142948	0.0101185	0.0113534	0.00982474	0.00969105	0.0110477	0.0158244	0.0132435	0.00984787	0.0187694	0.0116812	0.00984624	0.0103286	0.0196109	0.011174	0.0112771	0.0088663	0.00825401
CHP23	K6801089	長春石油化學股份有限公司苗栗廠		230787	2720952	0.0234556	0.0248957	0.0223728	0.0706067	0.0648142	0.0639812	0.033401	0.024383	0.0183794	0.0254914	0.0235407	0.0238826	0.0197457	0.0395759	0.0286747	0.0340266	0.0652779	0.0734393	0.0572922	0.122273	0.0637094	0.0801026	0.0921117	0.237975	1.88494	0.17413	0.0998527	0.0909722	0.133039	0.095689	0.0962385	0.101659	0.148002	0.122036	0.100645	0.194142	0.110831	0.0950795	0.0949908	0.117818	0.106884	0.103267	0.0809585	0.0715371
CHP24	K7201001	中國石油化學工業開發股份有限公司 頭份廠		238911	2731862	0.00440134	0.0044346	0.00414078	0.0117957	0.0108089	0.0105187	0.00577311	0.0043526	0.00319099	0.00464645	0.00435253	0.00440352	0.00338311	0.00689557	0.00533816	0.0060327	0.0112057	0.0138551	0.00968105	0.0169362	0.012124	0.0129659	0.0156825	0.0339625	0.0557973	0.0194898	0.0132452	0.00876981	0.0114235	0.00874556	0.00897164	0.0104668	0.0140911	0.0114942	0.0101626	0.0178278	0.0103616	0.00881998	0.00911123	0.0140565	0.00994	0.00996036	0.00779104	0.00707674
CHP25	N1400562	榮成紙業股份有限公司		185130	2.6404e+06	0.00316887	0.00295837	0.00351947	0.00411699	0.00397132	0.00361946	0.00286396	0.00226557	0.00197529	0.00272043	0.00311484	0.00276484	0.00180759	0.00290219	0.00258969	0.0036469	0.00528113	0.00569629	0.00499483	0.00764456	0.00410677	0.00671253	0.00526827	0.00764449	0.00938435	0.00884179	0.0079195	0.00653219	0.0104971	0.00894312	0.00864425	0.00895048	0.0151736	0.0655225	0.0111488	0.0261649	0.054693	0.0356001	0.0369692	0.0425269	0.0259718	0.0325168	0.024105	0.0238223
CHP26	P5801728	台塑石化股份有限公司麥寮二廠		168163	2634743	0.012095	0.01236	0.0124067	0.022516	0.020041	0.0193777	0.0130674	0.0111857	0.00800434	0.0105204	0.0122324	0.0110615	0.00875265	0.0160104	0.0117998	0.0156835	0.0226883	0.0250222	0.0221705	0.0380953	0.0192613	0.0255005	0.0239062	0.0386127	0.0481718	0.043066	0.0356565	0.0210727	0.0399328	0.0312415	0.0309446	0.0255918	0.0361438	0.0458841	0.0460928	0.0714664	0.0728163	0.0671253	0.0853509	0.119572	0.0671836	0.0943648	0.0696013	0.0762139
CHP27	P5802421	台塑石化股份有限公司麥寮一廠		167420	2633630	0.0345242	0.0284294	0.0330972	0.0797599	0.0567466	0.0589315	0.0300897	0.02465	0.0180216	0.0222301	0.0256209	0.0243604	0.0198482	0.0410702	0.0298469	0.0327186	0.0466325	0.0487217	0.0442603	0.122975	0.0448061	0.0485207	0.0563813	0.0786093	0.167946	0.103941	0.0791868	0.0441563	0.079572	0.0650351	0.0609768	0.0528193	0.0707147	0.087557	0.0971745	0.15869	0.12705	0.127419	0.144509	0.177592	0.126019	0.165297	0.129195	0.129688
CHP28	P5802430	台塑石化股份有限公司麥寮三廠		166121	2629765	0.0117403	0.0120446	0.0119295	0.0222163	0.0209978	0.0199906	0.0134544	0.0101588	0.00860505	0.0103675	0.0119164	0.011238	0.00862418	0.0150311	0.0111417	0.014156	0.0217485	0.0231481	0.0216437	0.0372527	0.0199585	0.0254358	0.0227573	0.0418942	0.0477107	0.0474815	0.0392313	0.0227664	0.0393714	0.0309505	0.0299885	0.0250726	0.0343978	0.043178	0.0475487	0.0706085	0.0636276	0.0673669	0.08665	0.231082	0.0650794	0.0951118	0.070762	0.0820322
CHP29	P4600987	福懋興業股份有限公司		207766	2625174	0.000954323	0.00130205	0.00121502	0.0034724	0.0023413	0.00239721	0.000992204	0.000824638	0.00081472	0.000697595	0.000739805	0.000913762	0.000687643	0.00165554	0.00125129	0.00124678	0.00180778	0.00164372	0.00186959	0.00472271	0.00125363	0.00194624	0.00163567	0.00228785	0.00531527	0.00544094	0.00518315	0.00448168	0.0065419	0.00472111	0.00458227	0.00517092	0.00430059	0.00645107	0.0168337	0.116591	0.00719119	0.00851159	0.00742671	0.00329548	0.0138941	0.0097144	0.00907763	0.00776788
CHP30	Q7100254	台灣化學纖維股份有限公司新港廠		186569	2602636	0.00601891	0.00830146	0.00723606	0.0135025	0.0138731	0.0131577	0.00925969	0.0058798	0.00477041	0.00508483	0.00536772	0.00576793	0.0048135	0.00914274	0.00741405	0.00741966	0.0114392	0.0128156	0.0127972	0.0218087	0.00949465	0.0127871	0.012106	0.0179322	0.0250176	0.0275098	0.027702	0.0165018	0.0240792	0.0189853	0.0178062	0.0154846	0.0241761	0.0422902	0.0400448	0.0908467	0.0647583	0.295327	0.126528	0.0559424	0.23576	0.197155	0.147507	0.150323
CHP31	Q7600375	南亞塑膠工業股份有限公司嘉義廠		185980	2599370	0.00132172	0.00200403	0.00156209	0.00301081	0.00306553	0.00294943	0.00204259	0.00129836	0.00110456	0.00112315	0.00124573	0.00123772	0.000988909	0.00204306	0.00174089	0.00177498	0.00252222	0.00296115	0.00288005	0.00526168	0.00218502	0.00301773	0.00283811	0.00393822	0.00541601	0.00687051	0.00695228	0.00421502	0.00585819	0.0048186	0.00437693	0.00413932	0.00615209	0.0119444	0.0104448	0.0262872	0.020944	0.11355	0.047257	0.0180641	0.140986	0.0773264	0.0483629	0.0497731
CHP32	G3700791	台灣化學纖維股份有限公司龍德廠		332748	2725075	0.00992274	0.00777685	0.00785282	0.0197276	0.0121017	0.00901928	0.00537706	0.00425286	0.00413164	0.0042301	0.00519014	0.00628151	0.00460938	0.00957316	0.00907815	0.00424736	0.00387973	0.00343942	0.00447741	0.0101861	0.0050456	0.00777299	0.00385709	0.00564549	0.00674468	0.00347016	0.00159378	0.000833259	0.00161688	0.0013787	0.00146451	0.00113557	0.00124963	0.00111254	0.00138541	0.00264836	0.000993628	0.00111867	0.00110202	0.00105387	0.00136135	0.0013825	0.0011838	0.00106728
CHP33	V7500777	永豐餘造紙股份有限公司台東廠		259100	2519111	0.000609098	0.00019902	9.22283e-05	0.00016293	8.82827e-05	4.84847e-05	3.91755e-05	4.38099e-05	7.7989e-05	2.38252e-05	4.20654e-05	4.82603e-05	3.56535e-05	9.54906e-05	0.00013701	1.62935e-05	2.65582e-05	6.90929e-06	1.36915e-05	2.81419e-05	1.69079e-05	2.01428e-05	2.14513e-05	3.18334e-05	7.03149e-05	9.12751e-06	7.00162e-06	1.00899e-05	1.51259e-05	1.57095e-05	2.02927e-05	1.59903e-05	1.64716e-05	2.09942e-05	1.12435e-05	2.74952e-05	3.08115e-05	3.71572e-05	4.02225e-05	3.0218e-05	3.70235e-05	7.17929e-05	9.39639e-05	0.000108017
[truncated: 27 more columns]

## Sheet: Dist
					stationID	EPA001	EPA002	EPA003	EPA004	EPA005	EPA006	EPA007	EPA008	EPA009	EPA010	EPA011	EPA012	EPA013	EPA014	EPA015	EPA017	EPA018	EPA019	EPA020	EPA021	EPA022	EPA023	EPA024	EPA025	EPA026	EPA027	EPA028	EPA029	EPA030	EPA031	EPA032	EPA033	EPA034	EPA035	EPA036	EPA037	EPA038	EPA039	EPA040	EPA041	EPA042	EPA043	EPA044	EPA045
					NAME	基隆	汐止	萬里	新店	土城	板橋	新莊	菜寮	林口	淡水	士林	中山	萬華	古亭	松山	桃園	大園	觀音	平鎮	龍潭	湖口	竹東	新竹	頭份	苗栗	三義	豐原	沙鹿	大里	忠明	西屯	彰化	線西	二林	南投	斗六	崙背	新港	朴子	臺西	嘉義	新營	善化	安南
					COUNTY	基隆市	新北市	新北市	新北市	新北市	新北市	新北市	新北市	新北市	新北市	臺北市	臺北市	臺北市	臺北市	臺北市	桃園市	桃園市	桃園市	桃園市	桃園市	新竹縣	新竹縣	新竹市	苗栗縣	苗栗縣	苗栗縣	臺中市	臺中市	臺中市	臺中市	臺中市	彰化縣	彰化縣	彰化縣	南投縣	雲林縣	雲林縣	嘉義縣	嘉義縣	雲林縣	嘉義市	臺南市	臺南市	臺南市
					TM2_X	326641	314649	319536	304294	295618	296293	293643	298528	286891	295286	301889	303121	301256	303445	308382	280729	270361	258351	270698	271862	253905	258993	247177	239737	231788	225536	223774	206205	217233	213527	211073	203377	196036	189902	217961	203604	183615	183185	173110	168718	192875	180167	178008	169896
代碼	C_NO	全名	Boiler Type	TM2_X	TM2_Y	2.7803e+06	2.7732e+06	2.78586e+06	2.76336e+06	2.76392e+06	2.76729e+06	2.77005e+06	2.7735e+06	2.77453e+06	2.78407e+06	2.77761e+06	2.77279e+06	2.77102e+06	2.76816e+06	2.77144e+06	2.76533e+06	2.77248e+06	2.76971e+06	2.76072e+06	2.75072e+06	2.75472e+06	2.73705e+06	2.74425e+06	2.73222e+06	2.71764e+06	2.69746e+06	2.68346e+06	2.68008e+06	2.66609e+06	2.6719e+06	2.67304e+06	2.66241e+06	2.66971e+06	2.64686e+06	2.64542e+06	2.62319e+06	2.62832e+06	2.60588e+06	2.59601e+06	2.62397e+06	2.59564e+06	2.57829e+06	2.5572e+06	2.54985e+06
CP01	F1700736	林口電廠(121.2994,25.11971)	超超臨界鍋爐 (ultra-supercritical boiler)	280192	2.77907e+06	46.4652	34.9524	39.9248	28.7687	21.6225	19.949	16.194	19.1632	8.09231	15.9013	21.7465	23.7742	22.548	25.6832	29.2041	13.7488	11.8378	23.761	20.6598	29.5518	35.8341	47.0615	47.9855	61.9016	78.2099	98.2258	111.012	123.586	129.336	126.214	126.57	139.68	137.994	160.098	147.425	173.682	179.029	198.51	212.079	191.005	203.152	224.314	244.269	254.377
CP02	L0200473	台中電廠(120.2994,25.11971)	超臨界鍋爐 (supercritical boiler)	196482	2.67927e+06	164.769	150.955	162.798	136.73	130.359	133.081	132.974	138.9	131.333	144.036	144.158	141.837	139.272	139.081	144.973	120.435	118.936	109.581	110.194	103.861	94.8154	85.1279	82.4155	68.3711	52.1421	34.2769	27.6121	9.7566	24.5804	18.5698	15.8653	18.2153	9.57114	33.0678	40.0849	56.5326	52.5437	74.5866	86.4762	61.8782	83.7059	102.286	123.457	132.122
CP03	P5801719	麥寮汽電(120.2033,23.81064)	超臨界鍋爐 (supercritical boiler)	168823	2.63428e+06	215.008	201.408	213.752	187.122	181.337	184.231	184.43	190.279	183.331	196.038	195.575	192.927	190.362	189.864	195.678	172.33	171.488	162.349	162.376	155.482	147.459	136.723	135.027	120.916	104.467	84.8973	73.7474	59.1182	57.9273	58.4265	57.336	44.5557	44.6731	24.5487	50.3862	36.508	15.9468	31.8283	38.5089	10.312	45.5144	57.1259	77.624	84.4379
CP04	S3200688	興達電廠(120.2002,22.8492)	超臨界鍋爐 (supercritical boiler)	167918	2.52781e+06	298.238	285.919	299.295	272.185	268.432	271.723	272.928	278.252	273.91	286.173	283.459	279.814	277.369	275.933	281.225	262.953	265.25	258.256	254.583	245.954	242.656	228.208	230.496	216.66	200.289	179.166	165.375	157.011	146.815	151.138	151.508	139.194	144.66	121.068	127.82	101.837	101.736	79.5483	68.4007	96.1648	72.2786	51.9496	31.0781	22.1305
CP05	U0100258	和平電廠(121.7628,24.3075)	次臨界鍋爐 (subcritical boiler)	327424	2.68929e+06	91.013	84.8806	96.8871	77.5991	81.1231	83.9849	87.5427	89.0301	94.3861	100.083	91.9347	86.9625	85.8208	82.4385	84.3279	89.2343	100.877	106.013	91.2149	82.8271	98.4167	83.4522	97.2626	97.6312	99.7499	102.215	103.815	121.569	112.607	115.218	117.481	126.927	132.84	143.919	117.926	140.361	156.198	166.622	180.317	171.624	163.933	184.406	199.431	210.378
CHP01	F0701702	南亞塑膠工業股份有限公司樹林廠		291366	2762741	39.4038	25.5259	36.4399	12.9427	4.41159	6.70794	7.65858	12.9257	12.6099	21.6897	18.2146	15.464	12.9006	13.2407	19.1108	10.948	23.1516	33.7425	20.766	22.9122	38.3108	41.3261	47.9027	59.9769	74.7245	92.7134	104.18	118.682	121.806	119.629	120.388	133.449	133.203	154.022	138.389	164.856	172.273	190.55	204.41	185.203	193.967	215.375	234.726	245.108
CHP02	F1600491	南亞塑膠工業股份有限公司林口二廠		291100	2770952	36.75	23.6563	32.1052	15.2211	8.35952	6.35301	2.69755	7.85336	5.52455	13.7731	12.6774	12.1608	10.1561	12.6557	17.2889	11.7958	20.7951	32.772	22.8231	27.9203	40.5837	46.6898	51.4037	64.3312	79.7509	98.4905	110.395	124.359	128.265	125.814	126.456	139.56	138.88	160.123	145.281	171.727	178.593	197.219	211.012	191.263	200.953	222.315	241.824	252.144
CHP03	H4601227	義芳化學工業股份有限公司桃園廠		276497	2778341	50.1824	38.496	43.6903	31.5757	23.9502	22.6706	19.0444	22.5566	11.0703	19.644	25.403	27.1972	25.8172	28.8054	32.6231	13.6799	8.48784	20.0925	18.5494	28.0101	32.6874	44.8442	44.9666	58.9801	75.3899	95.6007	108.542	120.816	126.933	123.674	123.97	137.065	135.186	157.434	145.236	171.424	176.442	196.089	209.603	188.274	200.928	222.034	242.08	252.135
CHP04	H4601398	南亞塑膠工業股份有限公司錦興廠		278563	2772270	48.7441	36.0979	43.1668	27.2291	18.9897	18.4157	15.2425	20.0031	8.62894	20.469	23.9295	24.5638	22.727	25.2184	29.8305	7.26813	8.20473	20.3727	13.9723	22.5706	30.2673	40.2883	42.0751	55.7821	71.9198	91.701	104.347	117.196	122.618	119.599	120.006	133.126	131.642	153.584	140.579	166.868	172.439	191.791	205.397	184.551	196.317	217.507	237.414	247.547
CHP05	H4700645	正隆股份有限公司大園廠		268147	2773464	58.8922	46.5025	52.8621	37.5318	29.0819	28.8149	25.7235	30.3812	18.774	29.139	33.996	34.9809	33.1986	35.6935	40.2858	14.9811	2.42409	10.4893	12.9957	23.0485	23.5428	37.543	35.9627	50.0838	66.6214	87.1379	100.344	112.061	118.831	115.32	115.51	128.563	126.354	148.83	137.524	163.552	167.961	187.894	201.3	179.541	193.099	214.085	234.296	244.247
CHP06	H4702336	大園汽電共生股份有限公司		268147	2773464	58.8922	46.5025	52.8621	37.5318	29.0819	28.8149	25.7235	30.3812	18.774	29.139	33.996	34.9809	33.1986	35.6935	40.2858	14.9811	2.42409	10.4893	12.9957	23.0485	23.5428	37.543	35.9627	50.0838	66.6214	87.1379	100.344	112.061	118.831	115.32	115.51	128.563	126.354	148.83	137.524	163.552	167.961	187.894	201.3	179.541	193.099	214.085	234.296	244.247
CHP07	H4810851	華亞汽電股份有限公司華亞汽電廠		287615	2769685	40.4441	27.2619	35.7835	17.8371	9.86389	9.002	6.03962	11.5611	4.8989	16.3056	16.3259	15.8138	13.7064	15.9028	20.841	8.14642	17.4785	29.2635	19.1447	24.6563	36.8836	43.4052	47.7732	60.7956	76.3247	95.2413	107.284	121.066	125.24	122.683	123.284	136.398	135.581	156.95	142.452	168.878	175.496	194.265	208.025	188.068	198.159	219.491	239.087	249.37
CHP08	H5200215	永豐餘工業用紙股份有限公司新屋廠		254173	2763278	74.4405	61.285	69.1527	50.1209	41.4495	42.3112	40.0476	45.518	34.5985	46.0731	49.8218	49.8637	47.7158	49.5137	54.8201	26.6353	18.6188	7.6722	16.7221	21.6955	8.56446	26.663	20.2752	34.2511	50.8331	71.7823	85.4072	96.0367	103.969	100.011	100.003	112.938	110.16	132.979	123.292	148.939	152.285	172.669	185.875	163.431	178.493	199.24	219.701	229.466
CHP09	L8801052	廣源造紙股份有限公司台中廠		212381	2700901	139.139	125.246	136.746	111.128	104.401	107.001	106.703	112.659	104.752	117.435	117.88	115.765	113.208	113.212	119.13	93.9299	92.1126	82.7545	83.5427	77.5865	67.974	58.989	55.5853	41.5823	25.6278	13.5992	20.8288	21.7189	35.145	29.0247	27.8922	39.5316	35.2161	58.528	55.7571	78.2087	78.0692	99.4083	112.001	88.4592	107.053	126.77	147.753	156.913
CHP10	L9200693	正隆股份有限公司后里分公司		222286	2686841	140.088	126.45	138.786	112.164	106.388	109.314	109.618	115.425	108.918	121.586	120.729	117.988	115.426	114.893	120.705	97.8593	98.2072	90.3792	88.3292	80.8576	74.8799	62.1992	62.571	48.6167	32.2306	11.1007	3.69007	17.445	21.355	17.3201	17.7822	30.895	31.3466	51.4495	41.6424	66.3395	70.1397	89.9115	103.288	82.5981	95.8256	116.434	136.992	146.668
CHP11	R0500400	東展興業股份有限公司		181706	2556541	266.598	254.198	267.549	240.422	236.603	239.889	241.076	246.412	242.039	254.306	251.624	248.001	245.551	244.141	249.457	231.083	233.426	226.532	222.731	214.085	210.919	196.363	198.797	185.013	168.703	147.573	133.713	125.944	115.168	119.666	120.143	108.063	114.07	90.6922	95.9926	70.1508	71.809	49.3579	40.395	68.6672	40.6634	21.8054	3.75615	13.5738
CHP12	R9702160	台灣汽電共生股份有限公司官田廠		180257	2567797	258.043	245.466	258.744	231.583	227.534	230.788	231.871	237.281	232.614	244.964	242.518	238.992	236.521	235.207	240.597	221.618	223.635	216.492	213.071	204.576	200.906	186.674	188.715	174.849	158.455	137.337	123.582	115.241	105.02	109.289	109.661	97.3954	103.125	79.6512	86.299	60.1088	60.6207	38.1922	29.1049	57.3447	30.5691	10.4954	10.8314	20.7236
CHP13	E5600841	中國鋼鐵股份有限公司		181739	2493493	321.333	309.683	323.209	296.393	293.425	296.798	298.342	303.388	300.065	311.978	308.476	304.532	302.172	300.428	305.439	289.302	292.721	286.647	281.646	272.555	271.01	255.519	259.153	245.669	229.666	208.612	194.566	188.183	176.211	181.216	181.927	170.296	176.794	153.586	156.189	131.524	134.845	112.393	102.88	131.124	102.753	84.8136	63.8177	57.587
CHP14	S1900658	台灣苯乙烯工業股份有限公司高雄廠		189002	2490082	321.203	309.751	323.298	296.605	293.859	297.249	298.887	303.846	300.82	312.614	308.893	304.871	302.539	300.711	305.637	290.132	293.881	288.102	282.701	273.489	272.478	256.698	260.739	247.394	231.545	210.567	196.483	190.774	178.26	183.464	184.284	172.925	179.763	156.783	158.018	133.903	138.347	115.941	107.114	135.415	105.629	88.6514	68.014	62.7466
CHP15	S1900685	台灣塑膠工業股份有限公司林園廠		189335	2489871	321.251	309.809	323.357	296.67	293.935	297.326	298.969	303.923	300.912	312.699	308.968	304.942	302.611	300.78	305.702	290.227	293.992	288.227	282.807	273.59	272.604	256.811	260.87	247.532	231.691	210.717	196.632	190.954	178.416	183.628	184.454	173.108	179.962	156.992	158.165	134.077	138.572	116.169	107.373	135.673	105.829	88.895	68.2767	63.0495
CHP16	S2001314	長春石油化學股份有限公司-大發廠		190854	2497075	314.094	302.61	316.154	289.443	286.672	290.06	291.689	296.656	293.606	305.408	301.708	297.694	295.359	293.541	298.478	282.912	286.649	280.869	275.471	266.264	265.246	249.465	253.509	240.17	224.33	203.359	189.274	183.646	171.064	176.288	177.122	165.807	172.711	149.79	150.805	126.754	131.449	109.072	100.514	128.81	98.5861	81.9171	61.4835	56.7832
CHP17	S2005081	長春人造樹脂股份有限公司大發廠		190695	2497322	313.94	302.449	315.994	289.279	286.5	289.888	291.514	296.484	293.424	305.231	301.537	297.525	295.189	293.374	298.314	282.729	286.455	280.667	275.281	266.077	265.043	249.271	253.304	239.961	224.117	203.143	189.058	183.414	170.844	176.064	176.895	165.573	172.468	149.542	150.591	126.525	131.194	108.814	100.243	128.539	98.3426	81.6516	61.2088	56.495
CHP18	S2100223	永豐餘造紙股份有限公司-久堂廠		190285	2506982	305.444	293.838	307.371	280.587	277.689	281.068	282.647	287.661	284.455	296.319	292.735	288.765	286.414	284.643	289.629	273.724	277.308	271.404	266.176	257.025	255.774	240.112	243.992	230.601	214.707	193.708	179.631	173.827	161.376	166.547	167.354	155.977	162.827	139.881	141.181	116.965	121.526	99.1493	90.6703	118.958	88.6962	72.0242	51.6984	47.4688
CHP19	S2201109	台灣塑膠工業股份有限公司仁武廠		181505	2511250	305.7	293.849	307.345	280.424	277.242	280.596	282.053	287.176	283.589	295.599	292.3	288.432	286.047	284.384	289.477	272.769	275.925	269.645	264.937	255.947	254.004	238.73	242.076	228.512	212.426	191.34	177.325	170.626	158.911	163.809	164.469	152.733	159.123	135.872	139.038	114.097	117.094	94.6417	85.1754	113.442	85.1529	67.0554	46.0844	40.307
CHP20	S2300401	中國人造纖維股份有限公司高雄總廠		181813	2514444	302.745	290.865	304.355	277.42	274.206	277.558	279.002	284.135	280.51	292.534	289.264	285.408	283.02	281.369	286.473	269.684	272.803	266.496	261.826	252.851	250.856	235.61	238.919	225.346	209.251	188.162	174.151	167.421	155.73	160.617	161.272	149.528	155.914	132.665	135.876	110.904	113.895	91.443	82.0297	110.305	81.9465	63.8692	42.9265	37.3568
CHP21	S2300429	國喬石油化學股份有限公司高雄廠		182323	2513515	303.319	291.46	304.954	278.03	274.841	278.195	279.65	284.774	281.182	293.194	289.899	286.033	283.648	281.988	287.083	270.362	273.517	267.241	262.528	253.539	251.6	236.322	239.674	226.113	210.032	188.948	174.931	168.267	156.52	161.429	162.095	150.375	156.794	133.562	136.638	111.717	114.817	92.3658	83.0086	111.288	82.8005	64.8129	43.8991	38.4004
CHP22	J5901658	長春人造樹脂廠股份有限公司新竹廠		251533	2752988	79.9199	66.2745	75.5297	53.7711	45.4194	46.9905	45.4368	51.277	41.4032	53.6715	56.0528	55.2576	52.893	54.0849	59.7687	31.6983	27.0979	18.061	20.6668	20.4559	2.93553	17.5935	9.76531	23.8862	40.4897	61.3165	74.861	85.851	93.4202	89.5539	89.6033	102.585	100.078	122.724	112.682	138.368	141.964	162.213	175.477	153.311	167.926	188.711	209.137	218.929
CHP23	K6801089	長春石油化學股份有限公司苗栗廠		230787	2720952	112.74	98.8085	109.95	84.8639	77.776	80.2405	79.7612	85.7337	77.5773	90.2466	90.9146	88.9902	86.4472	86.6499	92.5747	66.8117	64.9683	56.0124	56.3428	50.7261	40.9214	32.4783	28.484	14.3881	3.46057	24.0763	38.1384	47.6959	56.5092	52.0011	51.8097	64.6425	61.9161	84.6222	76.6095	101.474	103.947	124.532	137.612	115.145	130.921	151.374	172.046	181.615
CHP24	K7201001	中國石油化學工業開發股份有限公司 頭份廠		238911	2731862	100.214	86.2868	97.0349	72.5753	65.1402	67.4393	66.7398	72.7187	64.2076	76.8387	77.8395	76.1441	73.6246	74.044	79.9542	53.563	51.3677	42.5511	42.9336	37.9645	27.3349	20.742	14.891	0.89926	15.9069	36.9149	50.71	61.2469	69.2501	65.1146	65.0771	78.0157	75.5077	98.1167	88.9408	114.267	117.378	137.759	150.948	128.717	143.79	164.422	184.974	194.658
CHP25	N1400562	榮成紙業股份有限公司		185130	2.6404e+06	198.991	185.504	198.046	171.229	165.723	168.697	169.071	174.856	168.362	181.042	180.163	177.337	174.779	174.132	179.896	157.312	157.189	148.603	147.645	140.329	133.41	121.645	120.971	106.828	90.2368	69.9132	57.8598	44.9274	41.1175	42.4089	41.6932	28.5881	31.2701	8.03212	33.2133	25.252	12.1713	34.5793	45.9892	23.2243	45.4262	62.3072	83.5039	91.8246
CHP26	P5801728	台塑石化股份有限公司麥寮二廠		168163	2634743	215.18	201.568	213.89	187.282	181.469	184.355	184.538	190.391	183.403	196.112	195.686	193.055	190.49	190.007	195.825	172.408	171.508	162.329	162.432	155.575	147.464	136.812	135.035	120.93	104.498	84.9972	73.9343	59.1821	58.2291	58.6383	57.5145	44.7817	44.7151	24.8887	50.9305	37.2777	16.7324	32.5412	39.0469	10.7886	46.257	57.7132	78.1639	84.9116
CHP27	P5802421	台塑石化股份有限公司麥寮一廠		167420	2633630	216.48	202.873	215.202	188.587	182.783	185.672	185.859	191.711	184.732	197.441	197.007	194.37	191.805	191.317	197.134	173.737	172.844	163.667	163.764	156.9	148.801	138.138	136.373	122.267	105.834	86.3201	75.2274	60.5125	59.4569	59.9197	58.8109	46.0554	46.0487	26.0867	51.8988	37.6611	17.0423	31.9184	38.0471	9.74808	45.7294	56.7871	77.1584	83.8175
CHP28	P5802430	台塑石化股份有限公司麥寮三廠		166121	2629765	220.063	206.483	218.862	192.198	186.458	189.364	189.586	195.427	188.527	201.233	200.725	198.052	195.488	194.967	200.774	177.52	176.727	167.606	167.589	160.657	152.706	141.902	140.273	126.158	109.7	90.0675	78.7871	64.3288	62.7064	63.4239	62.397	49.5339	49.9032	29.2888	54.1533	38.0561	17.5537	29.3571	34.4702	6.35149	43.3621	53.355	73.5307	80.005
CHP29	P4600987	福懋興業股份有限公司		207766	2625174	195.437	182.584	195.733	168.563	164.219	167.436	168.419	173.893	169.021	181.408	179.152	175.734	173.242	172.049	177.532	158.012	160.051	153.135	149.444	140.959	137.515	123.05	125.427	111.716	95.5346	74.4336	60.4481	54.927	41.9993	47.0788	47.9796	37.4923	46.0527	28.0981	22.6714	4.61214	24.3552	31.2506	45.2942	39.0666	33.0752	54.4023	74.2008	84.3086
CHP30	Q7100254	台灣化學纖維股份有限公司新港廠		186569	2602636	226.241	213.303	226.384	199.229	194.688	197.867	198.73	204.278	199.028	211.516	209.557	206.243	203.735	202.632	208.167	187.979	189.386	181.844	179.077	170.889	166.322	152.687	154.037	140.065	123.574	102.514	88.9795	79.8934	70.4769	74.3242	74.546	62.0908	67.7366	44.3515	53.0684	26.6929	25.8578	4.68532	15.0017	27.8162	9.41841	25.1717	46.2338	55.3573
CHP31	Q7600375	南亞塑膠工業股份有限公司嘉義廠		185980	2599370	229.175	216.273	229.378	202.217	197.728	200.916	201.802	207.337	202.149	214.623	212.612	209.275	206.77	205.644	211.165	191.104	192.577	185.079	182.24	174.016	169.549	155.845	157.273	143.312	126.83	105.761	92.1963	83.2043	73.6792	77.584	77.8258	65.395	71.053	47.6537	56.069	29.6282	29.051	7.08155	13.3016	30.0512	7.83922	21.8648	42.9153	52.0673
CHP32	G3700791	台灣化學纖維股份有限公司龍德廠		332748	2725075	55.562	51.42	62.2005	47.7027	53.7352	55.7789	59.6004	59.2964	67.444	69.8873	60.9259	56.163	55.7056	52.1093	52.3781	65.777	78.3522	86.7603	71.5597	66.0649	84.2315	74.7219	87.6928	93.285	101.234	110.712	116.649	134.305	129.702	130.543	132.335	143.75	147.498	162.857	139.715	164.498	177.767	191.252	205.285	192.687	190.572	211.722	228.311	239.217
CHP33	V7500777	永豐餘造紙股份有限公司台東廠		259100	2519111	269.781	260.094	273.506	248.397	247.516	250.953	253.309	257.427	256.926	267.422	262.015	257.468	255.416	252.971	257.097	247.169	253.616	250.603	241.888	231.957	235.664	217.943	225.453	213.985	200.398	181.475	168.107	169.436	152.828	159.44	161.247	153.751	163.268	145.288	132.843	117.947	132.761	115.288	115.36	138.434	101.205	98.6549	89.5921	94.3511
PM2.5>0.01
CP01	F1700736	林口電廠(121.2994,25.11971)		280192	2.77907e+06	1	1	1	1	1	1	1	1	1	1	1	1	1	1	1	1	1	1	1	1	1	1	1	1	1	1	1	1	1	1	1	1	1	1	1	1	1	1	1	1	1	1	1	1
CP02	L0200473	台中電廠(120.2994,25.11971)		196482	2.67927e+06	1	1	1	1	1	1	1	1	1	1	1	1	1	1	1	1	1	1	1	1	1	1	1	1	1	1	1	1	1	1	1	1	1	1	1	1	1	1	1	1	1	1	1	1
CP03	P5801719	麥寮汽電(120.2033,23.81064)		168823	2.63428e+06	1	1	1	1	1	1	1	1	1	1	1	1	1	1	1	1	1	1	1	1	1	1	1	1	1	1	1	1	1	1	1	1	1	1	1	1	1	1	1	1	1	1	1	1
CP04	S3200688	興達電廠(120.2002,22.8492)		167918	2.52781e+06	1	1	1	1	1	1	1	1	1	1	1	1	1	1	1	1	1	1	1	1	1	1	1	1	1	1	1	1	1	1	1	1	1	1	1	1	1	1	1	1	1	1	1	1
CP05	U0100258	和平電廠(121.7628,24.3075)		327424	2.68929e+06	1	1	1	1	1	1	1	1	1	1	1	1	1	1	1	1	1	1	1	1	1	1	1	1	1	1	1	0	1	1	0	0	1	1	1	1	0	1	1	0	0	1	0	0
CHP01	F0701702	南亞塑膠工業股份有限公司樹林廠		291366	2762741	1	1	1	1	1	1	1	1	1	1	1	1	0	1	1	1	1	1	1	1	1	1	1	1	1	1	0	0	0	0	0	0	0	0	0	1	0	0	0	0	0	0	0	0
CHP02	F1600491	南亞塑膠工業股份有限公司林口二廠		291100	2770952	1	1	1	1	1	1	1	1	1	1	1	1	0	1	1	1	1	1	1	1	0	1	1	1	1	0	0	0	0	0	0	0	0	0	0	0	0	0	0	0	0	0	0	0
CHP03	H4601227	義芳化學工業股份有限公司桃園廠		276497	2778341	1	1	1	1	1	1	1	1	1	1	1	1	1	1	1	1	1	1	1	1	1	1	1	1	1	1	1	0	0	0	0	0	1	1	0	1	1	1	0	1	1	1	0	0
CHP04	H4601398	南亞塑膠工業股份有限公司錦興廠		278563	2772270	1	1	1	1	1	1	1	1	1	1	1	1	1	1	1	1	1	1	1	1	1	1	1	1	1	1	1	0	0	0	0	0	1	1	0	1	1	0	0	1	0	0	0	0
CHP05	H4700645	正隆股份有限公司大園廠		268147	2773464	0	0	0	0	0	0	0	0	0	0	0	0	0	0	0	0	1	1	1	0	1	0	0	0	0	0	0	0	0	0	0	0	0	0	0	0	0	0	0	0	0	0	0	0
CHP06	H4702336	大園汽電共生股份有限公司		268147	2773464	1	1	1	1	1	1	1	0	0	1	1	0	0	1	1	1	1	1	1	1	1	1	1	1	1	1	0	0	0	0	0	0	0	0	0	1	0	0	0	1	0	0	0	0
CHP07	H4810851	華亞汽電股份有限公司華亞汽電廠		287615	2769685	1	1	1	1	1	1	1	1	1	1	1	1	1	1	1	1	1	1	1	1	1	1	1	1	1	1	1	0	1	1	0	1	1	1	1	1	1	1	1	1	1	1	0	0
CHP08	H5200215	永豐餘工業用紙股份有限公司新屋廠		254173	2763278	1	1	1	1	1	1	1	1	1	1	1	1	1	1	1	1	1	1	1	1	1	1	1	1	1	1	1	1	1	1	1	1	1	1	1	1	1	1	1	1	1	1	1	1
CHP09	L8801052	廣源造紙股份有限公司台中廠		212381	2700901	0	0	0	0	0	0	0	0	0	0	0	0	0	0	0	0	0	0	0	0	0	0	0	0	1	0	0	0	0	0	0	0	1	0	0	0	0	0	0	0	0	0	0	0
CHP10	L9200693	正隆股份有限公司后里分公司		222286	2686841	1	1	1	1	1	1	1	1	1	1	1	1	0	1	1	1	1	1	1	1	1	1	1	1	1	1	1	1	1	1	1	1	1	1	1	1	1	1	1	1	1	1	1	1
CHP11	R0500400	東展興業股份有限公司		181706	2556541	0	0	0	0	0	0	0	0	0	0	0	0	0	0	0	0	0	0	0	0	0	0	0	0	0	0	0	0	0	0	0	0	0	0	0	0	0	1	1	0	1	1	1	1
CHP12	R9702160	台灣汽電共生股份有限公司官田廠		180257	2567797	0	0	0	0	0	0	0	0	0	0	0	0	0	0	0	0	0	0	0	1	0	0	0	1	1	1	1	0	0	0	0	0	1	1	1	1	1	1	1	1	1	1	1	1
CHP13	E5600841	中國鋼鐵股份有限公司		181739	2493493	0	0	0	0	0	0	0	0	0	0	0	0	0	0	0	0	0	0	0	0	0	0	0	0	1	0	0	0	0	0	0	0	0	0	0	0	0	1	1	1	0	1	1	1
CHP14	S1900658	台灣苯乙烯工業股份有限公司高雄廠		189002	2490082	0	0	0	0	0	0	0	0	0	0	0	0	0	0	0	0	0	0	0	0	0	0	0	0	0	0	0	0	0	0	0	0	0	0	0	0	0	0	0	0	0	0	0	0
CHP15	S1900685	台灣塑膠工業股份有限公司林園廠		189335	2489871	0	0	0	0	0	0	0	0	0	0	0	0	0	0	0	0	0	0	0	0	0	0	0	0	0	0	0	0	0	0	0	0	0	0	0	0	0	0	0	0	0	0	0	0
CHP16	S2001314	長春石油化學股份有限公司-大發廠		190854	2497075	0	0	0	0	0	0	0	0	0	0	0	0	0	0	0	0	0	0	0	0	0	0	0	0	0	0	0	0	0	0	0	0	0	0	0	0	0	0	0	0	0	0	0	0
CHP17	S2005081	長春人造樹脂股份有限公司大發廠		190695	2497322	0	0	0	0	0	0	0	0	0	0	0	0	0	0	0	0	0	0	0	0	0	0	0	0	0	0	0	0	0	0	0	0	0	0	0	0	0	0	0	0	0	0	0	0
CHP18	S2100223	永豐餘造紙股份有限公司-久堂廠		190285	2506982	0	0	0	0	0	0	0	0	0	0	0	0	0	0	0	0	0	0	0	0	0	0	0	0	0	0	0	0	0	0	0	0	0	0	0	0	0	0	0	0	0	0	0	0
CHP19	S2201109	台灣塑膠工業股份有限公司仁武廠		181505	2511250	0	0	0	0	0	0	0	0	0	0	0	0	0	0	0	0	0	0	0	0	0	0	0	0	0	0	0	0	0	0	0	0	0	0	0	1	1	1	1	1	1	1	1	1
CHP20	S2300401	中國人造纖維股份有限公司高雄總廠		181813	2514444	0	0	0	0	0	0	0	0	0	0	0	0	0	0	0	0	0	0	0	0	0	0	0	0	0	0	0	0	0	0	0	0	0	0	0	0	0	0	0	0	0	0	0	0
CHP21	S2300429	國喬石油化學股份有限公司高雄廠		182323	2513515	0	0	0	0	0	0	0	0	0	0	0	0	0	0	0	0	0	0	0	0	0	0	0	0	0	0	0	0	0	0	0	0	0	0	0	0	0	0	0	0	0	0	0	0
CHP22	J5901658	長春人造樹脂廠股份有限公司新竹廠		251533	2752988	0	0	0	1	1	1	1	0	0	0	0	0	0	1	1	1	1	1	1	1	1	1	1	1	1	1	1	1	1	0	0	1	1	1	0	1	1	0	1	1	1	1	0	0
CHP23	K6801089	長春石油化學股份有限公司苗栗廠		230787	2720952	1	1	1	1	1	1	1	1	1	1	1	1	1	1	1	1	1	1	1	1	1	1	1	1	1	1	1	1	1	1	1	1	1	1	1	1	1	1	1	1	1	1	1	1
CHP24	K7201001	中國石油化學工業開發股份有限公司 頭份廠		238911	2731862	0	0	0	1	1	1	0	0	0	0	0	0	0	0	0	0	1	1	0	1	1	1	1	1	1	1	1	0	1	0	0	1	1	1	1	1	1	0	0	1	0	0	0	0
CHP25	N1400562	榮成紙業股份有限公司		185130	2.6404e+06	0	0	0	0	0	0	0	0	0	0	0	0	0	0	0	0	0	0	0	0	0	0	0	0	0	0	0	0	1	0	0	0	1	1	1	1	1	1	1	1	1	1	1	1
CHP26	P5801728	台塑石化股份有限公司麥寮二廠		168163	2634743	1	1	1	1	1	1	1	1	0	1	1	1	0	1	1	1	1	1	1	1	1	1	1	1	1	1	1	1	1	1	1	1	1	1	1	1	1	1	1	1	1	1	1	1
CHP27	P5802421	台塑石化股份有限公司麥寮一廠		167420	2633630	1	1	1	1	1	1	1	1	1	1	1	1	1	1	1	1	1	1	1	1	1	1	1	1	1	1	1	1	1	1	1	1	1	1	1	1	1	1	1	1	1	1	1	1
CHP28	P5802430	台塑石化股份有限公司麥寮三廠		166121	2629765	1	1	1	1	1	1	1	1	0	1	1	1	0	1	1	1	1	1	1	1	1	1	1	1	1	1	1	1	1	1	1	1	1	1	1	1	1	1	1	1	1	1	1	1
CHP29	P4600987	福懋興業股份有限公司		207766	2625174	0	0	0	0	0	0	0	0	0	0	0	0	0	0	0	0	0	0	0	0	0	0	0	0	0	0	0	0	0	0	0	0	0	0	1	1	0	0	0	0	1	0	0	0
CHP30	Q7100254	台灣化學纖維股份有限公司新港廠		186569	2602636	0	0	0	1	1	1	0	0	0	0	0	0	0	0	0	0	1	1	1	1	0	1	1	1	1	1	1	1	1	1	1	1	1	1	1	1	1	1	1	1	1	1	1	1
CHP31	Q7600375	南亞塑膠工業股份有限公司嘉義廠		185980	2599370	0	0	0	0	0	0	0	0	0	0	0	0	0	0	0	0	0	0	0	0	0	0	0	0	0	0	0	0	0	0	0	0	0	1	1	1	1	1	1	1	1	1	1	1
CHP32	G3700791	台灣化學纖維股份有限公司龍德廠		332748	2725075	0	0	0	1	1	0	0	0	0	0	0	0	0	0	0	0	0	0	0	1	0	0	0	0	0	0	0	0	0	0	0	0	0	0	0	0	0	0	0	0	0	0	0	0
CHP33	V7500777	永豐餘造紙股份有限公司台東廠		259100	2519111	0	0	0	0	0	0	0	0	0	0	0	0	0	0	0	0	0	0	0	0	0	0	0	0	0	0	0	0	0	0	0	0	0	0	0	0	0	0	0	0	0	0	0	0
PM2.5>0.1
CP01	F1700736	林口電廠(121.2994,25.11971)		280192	2.77907e+06	1	1	1	1	1	1	1	1	1	1	1	1	0	1	1	1	1	1	1	1	1	1	1	1	1	0	0	0	0	0	0	0	0	0	0	1	0	0	0	0	0	0	0	0
CP02	L0200473	台中電廠(120.2994,25.11971)		196482	2.67927e+06	1	1	1	1	1	1	1	1	1	1	1	1	1	1	1	1	1	1	1	1	1	1	1	1	1	1	1	1	1	1	1	1	1	1	1	1	1	1	1	1	1	1	1	1
CP03	P5801719	麥寮汽電(120.2033,23.81064)		168823	2.63428e+06	0	0	0	0	0	0	0	0	0	0	0	0	0	0	0	0	0	0	0	1	0	0	0	0	1	1	0	0	0	0	0	0	0	0	0	1	1	1	1	1	1	1	1	1
CP04	S3200688	興達電廠(120.2002,22.8492)		167918	2.52781e+06	0	0	0	1	0	0	0	0	0	0	0	0	0	0	0	0	0	0	0	1	0	0	0	0	1	1	1	0	0	0	0	0	0	1	1	1	1	1	1	1	1	1	1	1
CP05	U0100258	和平電廠(121.7628,24.3075)		327424	2.68929e+06	1	0	0	1	1	1	0	0	0	0	0	0	0	1	1	0	0	0	0	1	0	0	0	0	0	0	0	0	0	0	0	0	0	0	0	0	0	0	0	0	0	0	0	0
CHP01	F0701702	南亞塑膠工業股份有限公司樹林廠		291366	2762741	0	0	0	0	0	0	0	0	0	0	0	0	0	0	0	0	0	0	0	0	0	0	0	0	0	0	0	0	0	0	0	0	0	0	0	0	0	0	0	0	0	0	0	0
CHP02	F1600491	南亞塑膠工業股份有限公司林口二廠		291100	2770952	0	0	0	0	0	0	0	0	0	0	0	0	0	0	0	0	0	0	0	0	0	0	0	0	0	0	0	0	0	0	0	0	0	0	0	0	0	0	0	0	0	0	0	0
CHP03	H4601227	義芳化學工業股份有限公司桃園廠		276497	2778341	0	0	0	0	0	0	0	0	0	0	0	0	0	0	0	0	0	0	0	0	0	0	0	0	0	0	0	0	0	0	0	0	0	0	0	0	0	0	0	0	0	0	0	0
CHP04	H4601398	南亞塑膠工業股份有限公司錦興廠		278563	2772270	0	0	0	0	0	0	0	0	0	0	0	0	0	0	0	0	0	0	0	0	0	0	0	0	0	0	0	0	0	0	0	0	0	0	0	0	0	0	0	0	0	0	0	0
CHP05	H4700645	正隆股份有限公司大園廠		268147	2773464	0	0	0	0	0	0	0	0	0	0	0	0	0	0	0	0	0	0	0	0	0	0	0	0	0	0	0	0	0	0	0	0	0	0	0	0	0	0	0	0	0	0	0	0
CHP06	H4702336	大園汽電共生股份有限公司		268147	2773464	0	0	0	0	0	0	0	0	0	0	0	0	0	0	0	0	0	0	0	0	0	0	0	0	0	0	0	0	0	0	0	0	0	0	0	0	0	0	0	0	0	0	0	0
CHP07	H4810851	華亞汽電股份有限公司華亞汽電廠		287615	2769685	0	0	0	1	1	0	0	0	0	0	0	0	0	0	0	1	0	0	0	0	0	0	0	0	0	0	0	0	0	0	0	0	0	0	0	0	0	0	0	0	0	0	0	0
CHP08	H5200215	永豐餘工業用紙股份有限公司新屋廠		254173	2763278	0	0	0	0	0	0	0	0	0	0	0	0	0	0	0	0	0	1	0	0	0	0	0	0	0	0	0	0	0	0	0	0	0	0	0	0	0	0	0	0	0	0	0	0
CHP09	L8801052	廣源造紙股份有限公司台中廠		212381	2700901	0	0	0	0	0	0	0	0	0	0	0	0	0	0	0	0	0	0	0	0	0	0	0	0	0	0	0	0	0	0	0	0	0	0	0	0	0	0	0	0	0	0	0	0
CHP10	L9200693	正隆股份有限公司后里分公司		222286	2686841	0	0	0	0	0	0	0	0	0	0	0	0	0	0	0	0	0	0	0	0	0	0	0	0	1	1	1	0	1	1	1	0	0	0	1	1	0	0	0	0	1	0	0	0
CHP11	R0500400	東展興業股份有限公司		181706	2556541	0	0	0	0	0	0	0	0	0	0	0	0	0	0	0	0	0	0	0	0	0	0	0	0	0	0	0	0	0	0	0	0	0	0	0	0	0	0	0	0	0	0	1	0
CHP12	R9702160	台灣汽電共生股份有限公司官田廠		180257	2567797	0	0	0	0	0	0	0	0	0	0	0	0	0	0	0	0	0	0	0	0	0	0	0	0	0	0	0	0	0	0	0	0	0	0	0	0	0	0	0	0	0	0	1	0
CHP13	E5600841	中國鋼鐵股份有限公司		181739	2493493	0	0	0	0	0	0	0	0	0	0	0	0	0	0	0	0	0	0	0	0	0	0	0	0	0	0	0	0	0	0	0	0	0	0	0	0	0	0	0	0	0	0	0	0
CHP14	S1900658	台灣苯乙烯工業股份有限公司高雄廠		189002	2490082	0	0	0	0	0	0	0	0	0	0	0	0	0	0	0	0	0	0	0	0	0	0	0	0	0	0	0	0	0	0	0	0	0	0	0	0	0	0	0	0	0	0	0	0
CHP15	S1900685	台灣塑膠工業股份有限公司林園廠		189335	2489871	0	0	0	0	0	0	0	0	0	0	0	0	0	0	0	0	0	0	0	0	0	0	0	0	0	0	0	0	0	0	0	0	0	0	0	0	0	0	0	0	0	0	0	0
CHP16	S2001314	長春石油化學股份有限公司-大發廠		190854	2497075	0	0	0	0	0	0	0	0	0	0	0	0	0	0	0	0	0	0	0	0	0	0	0	0	0	0	0	0	0	0	0	0	0	0	0	0	0	0	0	0	0	0	0	0
CHP17	S2005081	長春人造樹脂股份有限公司大發廠		190695	2497322	0	0	0	0	0	0	0	0	0	0	0	0	0	0	0	0	0	0	0	0	0	0	0	0	0	0	0	0	0	0	0	0	0	0	0	0	0	0	0	0	0	0	0	0
CHP18	S2100223	永豐餘造紙股份有限公司-久堂廠		190285	2506982	0	0	0	0	0	0	0	0	0	0	0	0	0	0	0	0	0	0	0	0	0	0	0	0	0	0	0	0	0	0	0	0	0	0	0	0	0	0	0	0	0	0	0	0
CHP19	S2201109	台灣塑膠工業股份有限公司仁武廠		181505	2511250	0	0	0	0	0	0	0	0	0	0	0	0	0	0	0	0	0	0	0	0	0	0	0	0	0	0	0	0	0	0	0	0	0	0	0	0	0	0	0	0	0	0	0	0
CHP20	S2300401	中國人造纖維股份有限公司高雄總廠		181813	2514444	0	0	0	0	0	0	0	0	0	0	0	0	0	0	0	0	0	0	0	0	0	0	0	0	0	0	0	0	0	0	0	0	0	0	0	0	0	0	0	0	0	0	0	0
CHP21	S2300429	國喬石油化學股份有限公司高雄廠		182323	2513515	0	0	0	0	0	0	0	0	0	0	0	0	0	0	0	0	0	0	0	0	0	0	0	0	0	0	0	0	0	0	0	0	0	0	0	0	0	0	0	0	0	0	0	0
CHP22	J5901658	長春人造樹脂廠股份有限公司新竹廠		251533	2752988	0	0	0	0	0	0	0	0	0	0	0	0	0	0	0	0	0	0	0	0	0	0	0	0	0	0	0	0	0	0	0	0	0	0	0	0	0	0	0	0	0	0	0	0
CHP23	K6801089	長春石油化學股份有限公司苗栗廠		230787	2720952	0	0	0	0	0	0	0	0	0	0	0	0	0	0	0	0	0	0	0	1	0	0	0	1	1	1	0	0	1	0	0	1	1	1	1	1	1	0	0	1	1	1	0	0
CHP24	K7201001	中國石油化學工業開發股份有限公司 頭份廠		238911	2731862	0	0	0	0	0	0	0	0	0	0	0	0	0	0	0	0	0	0	0	0	0	0	0	0	0	0	0	0	0	0	0	0	0	0	0	0	0	0	0	0	0	0	0	0
CHP25	N1400562	榮成紙業股份有限公司		185130	2.6404e+06	0	0	0	0	0	0	0	0	0	0	0	0	0	0	0	0	0	0	0	0	0	0	0	0	0	0	0	0	0	0	0	0	0	0	0	0	0	0	0	0	0	0	0	0
CHP26	P5801728	台塑石化股份有限公司麥寮二廠		168163	2634743	0	0	0	0	0	0	0	0	0	0	0	0	0	0	0	0	0	0	0	0	0	0	0	0	0	0	0	0	0	0	0	0	0	0	0	0	0	0	0	1	0	0	0	0
CHP27	P5802421	台塑石化股份有限公司麥寮一廠		167420	2633630	0	0	0	0	0	0	0	0	0	0	0	0	0	0	0	0	0	0	0	1	0	0	0	0	1	1	0	0	0	0	0	0	0	0	0	1	1	1	1	1	1	1	1	1
CHP28	P5802430	台塑石化股份有限公司麥寮三廠		166121	2629765	0	0	0	0	0	0	0	0	0	0	0	0	0	0	0	0	0	0	0	0	0	0	0	0	0	0	0	0	0	0	0	0	0	0	0	0	0	0	0	1	0	0	0	0
CHP29	P4600987	福懋興業股份有限公司		207766	2625174	0	0	0	0	0	0	0	0	0	0	0	0	0	0	0	0	0	0	0	0	0	0	0	0	0	0	0	0	0	0	0	0	0	0	0	1	0	0	0	0	0	0	0	0
CHP30	Q7100254	台灣化學纖維股份有限公司新港廠		186569	2602636	0	0	0	0	0	0	0	0	0	0	0	0	0	0	0	0	0	0	0	0	0	0	0	0	0	0	0	0	0	0	0	0	0	0	0	0	0	1	1	0	1	1	1	1
CHP31	Q7600375	南亞塑膠工業股份有限公司嘉義廠		185980	2599370	0	0	0	0	0	0	0	0	0	0	0	0	0	0	0	0	0	0	0	0	0	0	0	0	0	0	0	0	0	0	0	0	0	0	0	0	0	1	0	0	1	0	0	0
CHP32	G3700791	台灣化學纖維股份有限公司龍德廠		332748	2725075	0	0	0	0	0	0	0	0	0	0	0	0	0	0	0	0	0	0	0	0	0	0	0	0	0	0	0	0	0	0	0	0	0	0	0	0	0	0	0	0	0	0	0	0
CHP33	V7500777	永豐餘造紙股份有限公司台東廠		259100	2519111	0	0	0	0	0	0	0	0	0	0	0	0	0	0	0	0	0	0	0	0	0	0	0	0	0	0	0	0	0	0	0	0	0	0	0	0	0	0	0	0	0	0	0	0
PM2.5>1
CP01	F1700736	林口電廠(121.2994,25.11971)		280192	2.77907e+06	0	0	0	0	0	0	0	0	0	0	0	0	0	0	0	0	0	0	0	0	0	0	0	0	0	0	0	0	0	0	0	0	0	0	0	0	0	0	0	0	0	0	0	0
CP02	L0200473	台中電廠(120.2994,25.11971)		196482	2.67927e+06	0	0	0	1	0	0	0	0	0	0	0	0	0	0	0	0	0	0	0	1	0	0	0	0	1	1	0	0	1	1	1	1	1	1	1	1	1	1	1	1	1	1	1	0
CP03	P5801719	麥寮汽電(120.2033,23.81064)		168823	2.63428e+06	0	0	0	0	0	0	0	0	0	0	0	0	0	0	0	0	0	0	0	0	0	0	0	0	0	0	0	0	0	0	0	0	0	0	0	0	0	0	0	0	0	0	0	0
CP04	S3200688	興達電廠(120.2002,22.8492)		167918	2.52781e+06	0	0	0	0	0	0	0	0	0	0	0	0	0	0	0	0	0	0	0	0	0	0	0	0	0	0	0	0	0	0	0	0	0	0	0	0	0	0	0	0	0	0	0	0
CP05	U0100258	和平電廠(121.7628,24.3075)		327424	2.68929e+06	0	0	0	0	0	0	0	0	0	0	0	0	0	0	0	0	0	0	0	0	0	0	0	0	0	0	0	0	0	0	0	0	0	0	0	0	0	0	0	0	0	0	0	0
CHP01	F0701702	南亞塑膠工業股份有限公司樹林廠		291366	2762741	0	0	0	0	0	0	0	0	0	0	0	0	0	0	0	0	0	0	0	0	0	0	0	0	0	0	0	0	0	0	0	0	0	0	0	0	0	0	0	0	0	0	0	0
CHP02	F1600491	南亞塑膠工業股份有限公司林口二廠		291100	2770952	0	0	0	0	0	0	0	0	0	0	0	0	0	0	0	0	0	0	0	0	0	0	0	0	0	0	0	0	0	0	0	0	0	0	0	0	0	0	0	0	0	0	0	0
CHP03	H4601227	義芳化學工業股份有限公司桃園廠		276497	2778341	0	0	0	0	0	0	0	0	0	0	0	0	0	0	0	0	0	0	0	0	0	0	0	0	0	0	0	0	0	0	0	0	0	0	0	0	0	0	0	0	0	0	0	0
CHP04	H4601398	南亞塑膠工業股份有限公司錦興廠		278563	2772270	0	0	0	0	0	0	0	0	0	0	0	0	0	0	0	0	0	0	0	0	0	0	0	0	0	0	0	0	0	0	0	0	0	0	0	0	0	0	0	0	0	0	0	0
CHP05	H4700645	正隆股份有限公司大園廠		268147	2773464	0	0	0	0	0	0	0	0	0	0	0	0	0	0	0	0	0	0	0	0	0	0	0	0	0	0	0	0	0	0	0	0	0	0	0	0	0	0	0	0	0	0	0	0
CHP06	H4702336	大園汽電共生股份有限公司		268147	2773464	0	0	0	0	0	0	0	0	0	0	0	0	0	0	0	0	0	0	0	0	0	0	0	0	0	0	0	0	0	0	0	0	0	0	0	0	0	0	0	0	0	0	0	0
CHP07	H4810851	華亞汽電股份有限公司華亞汽電廠		287615	2769685	0	0	0	0	0	0	0	0	0	0	0	0	0	0	0	0	0	0	0	0	0	0	0	0	0	0	0	0	0	0	0	0	0	0	0	0	0	0	0	0	0	0	0	0
CHP08	H5200215	永豐餘工業用紙股份有限公司新屋廠		254173	2763278	0	0	0	0	0	0	0	0	0	0	0	0	0	0	0	0	0	0	0	0	0	0	0	0	0	0	0	0	0	0	0	0	0	0	0	0	0	0	0	0	0	0	0	0
CHP09	L8801052	廣源造紙股份有限公司台中廠		212381	2700901	0	0	0	0	0	0	0	0	0	0	0	0	0	0	0	0	0	0	0	0	0	0	0	0	0	0	0	0	0	0	0	0	0	0	0	0	0	0	0	0	0	0	0	0
CHP10	L9200693	正隆股份有限公司后里分公司		222286	2686841	0	0	0	0	0	0	0	0	0	0	0	0	0	0	0	0	0	0	0	0	0	0	0	0	0	0	0	0	0	0	0	0	0	0	0	0	0	0	0	0	0	0	0	0
CHP11	R0500400	東展興業股份有限公司		181706	2556541	0	0	0	0	0	0	0	0	0	0	0	0	0	0	0	0	0	0	0	0	0	0	0	0	0	0	0	0	0	0	0	0	0	0	0	0	0	0	0	0	0	0	0	0
CHP12	R9702160	台灣汽電共生股份有限公司官田廠		180257	2567797	0	0	0	0	0	0	0	0	0	0	0	0	0	0	0	0	0	0	0	0	0	0	0	0	0	0	0	0	0	0	0	0	0	0	0	0	0	0	0	0	0	0	0	0
CHP13	E5600841	中國鋼鐵股份有限公司		181739	2493493	0	0	0	0	0	0	0	0	0	0	0	0	0	0	0	0	0	0	0	0	0	0	0	0	0	0	0	0	0	0	0	0	0	0	0	0	0	0	0	0	0	0	0	0
CHP14	S1900658	台灣苯乙烯工業股份有限公司高雄廠		189002	2490082	0	0	0	0	0	0	0	0	0	0	0	0	0	0	0	0	0	0	0	0	0	0	0	0	0	0	0	0	0	0	0	0	0	0	0	0	0	0	0	0	0	0	0	0
CHP15	S1900685	台灣塑膠工業股份有限公司林園廠		189335	2489871	0	0	0	0	0	0	0	0	0	0	0	0	0	0	0	0	0	0	0	0	0	0	0	0	0	0	0	0	0	0	0	0	0	0	0	0	0	0	0	0	0	0	0	0
CHP16	S2001314	長春石油化學股份有限公司-大發廠		190854	2497075	0	0	0	0	0	0	0	0	0	0	0	0	0	0	0	0	0	0	0	0	0	0	0	0	0	0	0	0	0	0	0	0	0	0	0	0	0	0	0	0	0	0	0	0
CHP17	S2005081	長春人造樹脂股份有限公司大發廠		190695	2497322	0	0	0	0	0	0	0	0	0	0	0	0	0	0	0	0	0	0	0	0	0	0	0	0	0	0	0	0	0	0	0	0	0	0	0	0	0	0	0	0	0	0	0	0
CHP18	S2100223	永豐餘造紙股份有限公司-久堂廠		190285	2506982	0	0	0	0	0	0	0	0	0	0	0	0	0	0	0	0	0	0	0	0	0	0	0	0	0	0	0	0	0	0	0	0	0	0	0	0	0	0	0	0	0	0	0	0
CHP19	S2201109	台灣塑膠工業股份有限公司仁武廠		181505	2511250	0	0	0	0	0	0	0	0	0	0	0	0	0	0	0	0	0	0	0	0	0	0	0	0	0	0	0	0	0	0	0	0	0	0	0	0	0	0	0	0	0	0	0	0
CHP20	S2300401	中國人造纖維股份有限公司高雄總廠		181813	2514444	0	0	0	0	0	0	0	0	0	0	0	0	0	0	0	0	0	0	0	0	0	0	0	0	0	0	0	0	0	0	0	0	0	0	0	0	0	0	0	0	0	0	0	0
CHP21	S2300429	國喬石油化學股份有限公司高雄廠		182323	2513515	0	0	0	0	0	0	0	0	0	0	0	0	0	0	0	0	0	0	0	0	0	0	0	0	0	0	0	0	0	0	0	0	0	0	0	0	0	0	0	0	0	0	0	0
CHP22	J5901658	長春人造樹脂廠股份有限公司新竹廠		251533	2752988	0	0	0	0	0	0	0	0	0	0	0	0	0	0	0	0	0	0	0	0	0	0	0	0	0	0	0	0	0	0	0	0	0	0	0	0	0	0	0	0	0	0	0	0
CHP23	K6801089	長春石油化學股份有限公司苗栗廠		230787	2720952	0	0	0	0	0	0	0	0	0	0	0	0	0	0	0	0	0	0	0	0	0	0	0	0	1	0	0	0	0	0	0	0	0	0	0	0	0	0	0	0	0	0	0	0
CHP24	K7201001	中國石油化學工業開發股份有限公司 頭份廠		238911	2731862	0	0	0	0	0	0	0	0	0	0	0	0	0	0	0	0	0	0	0	0	0	0	0	0	0	0	0	0	0	0	0	0	0	0	0	0	0	0	0	0	0	0	0	0
CHP25	N1400562	榮成紙業股份有限公司		185130	2.6404e+06	0	0	0	0	0	0	0	0	0	0	0	0	0	0	0	0	0	0	0	0	0	0	0	0	0	0	0	0	0	0	0	0	0	0	0	0	0	0	0	0	0	0	0	0
CHP26	P5801728	台塑石化股份有限公司麥寮二廠		168163	2634743	0	0	0	0	0	0	0	0	0	0	0	0	0	0	0	0	0	0	0	0	0	0	0	0	0	0	0	0	0	0	0	0	0	0	0	0	0	0	0	0	0	0	0	0
CHP27	P5802421	台塑石化股份有限公司麥寮一廠		167420	2633630	0	0	0	0	0	0	0	0	0	0	0	0	0	0	0	0	0	0	0	0	0	0	0	0	0	0	0	0	0	0	0	0	0	0	0	0	0	0	0	0	0	0	0	0
CHP28	P5802430	台塑石化股份有限公司麥寮三廠		166121	2629765	0	0	0	0	0	0	0	0	0	0	0	0	0	0	0	0	0	0	0	0	0	0	0	0	0	0	0	0	0	0	0	0	0	0	0	0	0	0	0	0	0	0	0	0
CHP29	P4600987	福懋興業股份有限公司		207766	2625174	0	0	0	0	0	0	0	0	0	0	0	0	0	0	0	0	0	0	0	0	0	0	0	0	0	0	0	0	0	0	0	0	0	0	0	0	0	0	0	0	0	0	0	0
CHP30	Q7100254	台灣化學纖維股份有限公司新港廠		186569	2602636	0	0	0	0	0	0	0	0	0	0	0	0	0	0	0	0	0	0	0	0	0	0	0	0	0	0	0	0	0	0	0	0	0	0	0	0	0	0	0	0	0	0	0	0
CHP31	Q7600375	南亞塑膠工業股份有限公司嘉義廠		185980	2599370	0	0	0	0	0	0	0	0	0	0	0	0	0	0	0	0	0	0	0	0	0	0	0	0	0	0	0	0	0	0	0	0	0	0	0	0	0	0	0	0	0	0	0	0
CHP32	G3700791	台灣化學纖維股份有限公司龍德廠		332748	2725075	0	0	0	0	0	0	0	0	0	0	0	0	0	0	0	0	0	0	0	0	0	0	0	0	0	0	0	0	0	0	0	0	0	0	0	0	0	0	0	0	0	0	0	0
CHP33	V7500777	永豐餘造紙股份有限公司台東廠		259100	2519111	0	0	0	0	0	0	0	0	0	0	0	0	0	0	0	0	0	0	0	0	0	0	0	0	0	0	0	0	0	0	0	0	0	0	0	0	0	0	0	0	0	0	0	0
[truncated: 106 more columns]
