# Supplementary material for: County-Wide Mortality Assessments Attributable to PM2.5 Emissions from Coal Consumption in Taiwan
Source: Int J Environ Res Public Health. 2022 Jan 30;19(3):1599. doi: 10.3390/ijerph19031599 (PMC8835574; doi:10.3390/ijerph19031599)
Supplement: Supplementary file 1 [file ijerph-19-01599-s001.zip › File S2 Data_HIA-CP+CHP-revision.xlsx]

## Sheet: Exp
City	NO_TOWN	NO_SITE	POP	Obs	10y_PM2.5	Std_PM2.5	CP5	Std_CP5	CHP33	Std_CHP33	COAL	Std_COAL	DeCP5	Std_DeCP5	DeCHP33	Std_DeCHP33	DeCOAL	Std_DeCOAL		CP5/Obs (%)	Coal/Obs (%)
Taipei City	12	6	2686516	24.6483	26.33	0.871759	0.602533	0.064	0.271644	0.012	0.874177	0.065	25.7275	0.874105	26.0584	0.871841	25.4558	0.874179		0.0244453	0.0354661
Taichung City	29	5	2701661	30.9302	34.6	0.507089	1.25791	0.103	0.642182	0.102	1.90009	0.145	33.3421	0.517444	33.9578	0.517246	32.6999	0.527413		0.0406692	0.0614315
Tainan City	37	4	1883208	35.9754	38.54	0.289838	1.62781	0.134	0.960819	0.043	2.58863	0.141	36.9122	0.319315	37.5792	0.29301	35.9514	0.322315		0.0452478	0.0719554
Kaohsiung City	38	12	2779877	39.3127	44.14	0.344795	1.6644	0.052	1.27121	0.064	2.93561	0.083	42.4756	0.348694	42.8688	0.350685	41.2044	0.354645		0.0423374	0.0746733
Keelung City	7	1	374914	18.3699	22	0.195397	0.799496		0.293562		1.09306		21.2005	0.195397	21.7064	0.195397	20.9069	0.195397		0.043522	0.0595026
Hsinchu City	3	1	428483	30.2819	30.52	0.165525	0.857894		0.545149		1.40304		29.6621	0.165525	29.9749	0.165525	29.117	0.165525		0.0283302	0.0463326
Chiayi City	2	1	270872	40.4824	44.39	0.218283	1.67897		1.10923		2.7882		42.711	0.218283	43.2808	0.218283	41.6018	0.218283		0.0414739	0.0688743
New Taipei City	29	11	3954929	25.398	26.22	0.450688	0.860464	0.101	0.398077	0.018	1.25854	0.102	25.3595	0.461866	25.8219	0.451047	24.9615	0.462086		0.0338792	0.0495527
Taoyuan City	13	6	2044023	25.793	27.65	0.395158	1.01219	0.127	0.611737	0.03	1.62393	0.131	26.6378	0.415065	27.0383	0.396295	26.0261	0.416306		0.039243	0.0629602
Hsinchu County	13	2	530486	25.2338	27.63	0.685015	0.795208	0.064	0.525708	0.033	1.32092	0.072	26.8348	0.687998	27.1043	0.685809	26.3091	0.688788		0.0315136	0.0523471
Miaoli County	18	3	565554	26.6037	28.2	0.268546	2.21566	0.735	1.5921	0.566	3.80776	0.927	25.9843	0.782523	26.6079	0.626476	24.3922	0.965114		0.083284	0.143129
Changhua County	26	3	1296013	32.7942	35.35	0.656402	1.5254	0.103	0.556299	0.028	2.0817	0.107	33.8246	0.664434	34.7937	0.656998	33.2683	0.665065		0.0465143	0.0634776
Nantou County	13	3	517222	35.0887	36.63	0.565526	4.21791	1.355	1.41748	0.183	5.63539	1.367	32.4121	1.46828	35.2125	0.594397	30.9946	1.47936		0.120207	0.160604
Yunlin County	20	4	707792	32.8466	35.17	1.21734	2.04187	0.424	1.05781	0.086	3.09968	0.432	33.1281	1.28907	34.1122	1.22038	32.0703	1.29172		0.0621637	0.0943682
Chiayi County	18	2	529229	32.9301	37.15	0.573615	1.57991	0.053	1.00169	0.118	2.58159	0.13	35.5701	0.576058	36.1483	0.585626	34.5684	0.588162		0.0479775	0.078396
Pingtung County	33	3	852286	32.8673	33.28	3.39098	1.15013	0.287	0.718127	0.074	1.86826	0.296	32.1299	3.40311	32.5619	3.39179	31.4117	3.40388		0.0349931	0.0568424
Ilan County	12	2	458456	19.5475	19.56	0.287608	0.417164	0.096	0.189862	0.091	0.607026	0.133	19.1428	0.303207	19.3701	0.301661	18.953	0.316871		0.0213411	0.031054
Hualien County	13	1	333897	18.4035	20.14	0.192776	0.738056		0.0300708		0.768126		19.4019	0.192776	20.1099	0.192776	19.3719	0.192776		0.040104	0.041738
Taitung County	16	1	224821	13.0888	13.66	0.144423	0.186673		0.128504		0.315177		13.4733	0.144423	13.5315	0.144423	13.3448	0.144423		0.0142621	0.0240799
																			P50	0.0406692	0.0614315
																			Avg	0.0442899	0.0671992

## Sheet: AD_PM25
City	Mean_IHD	SD_IHD	LCL_IHD	HCL_IHD	PAF_IHD	Mean_St	SD_St	LCL_St	HCL_St	PAF_St	Mean_LC	SD_LC	LCL_LC	HCL_LC	PAF_LC	Mean_COPD	SD_COPD	LCL_COPD	HCL_COPD	PAF_COPD	Mean_AD	SD_AD	LCL_AD	HCL_CAD	PAF_AD
Taipei City	144.835	13.3384	116.191	171.393	0.139937	263.285	19.9005	224.895	301.95	0.217591	137.561	9.59637	119.293	155.773	0.139232	60.4887	27.7917	15.6257	117.694	0.113701	606.17	41.0545	529.686	688.401	0.161001
Taichung City	143.628	11.6098	119.5	164.66	0.184611	312.167	20.1128	270.758	350.93	0.289849	155.469	8.46133	138.179	171.151	0.1787	81.0674	35.2568	22.321	150.738	0.145805	692.331	42.9488	612.306	778.253	0.211012
Tainan City	138.135	10.8427	116.802	159.015	0.198185	310.686	19.9216	270.293	349.519	0.310686	152.29	8.41334	135.089	168.412	0.19625	83.1295	34.2659	23.1694	151.664	0.160482	684.24	41.9714	600.393	768.606	0.228766
Kaohsiung City	251.363	19.5585	214.143	288.439	0.226046	446.302	25.634	395.108	492.932	0.356187	235.359	11.9694	211.243	257.464	0.221828	113.254	41.4949	41.0045	194.101	0.179199	1046.28	55.1364	944.644	1155.91	0.257831
Keelung City	20.9514	1.72611	17.4575	24.2345	0.123244	41.295	2.56992	36.0718	46.4178	0.205448	17.4418	0.942545	15.6383	19.3175	0.11785	8.37298	3.16221	2.83955	14.7997	0.0996783	88.0613	4.57745	79.0426	97.259	0.146039
Hsinchu City	27.9917	2.33483	23.1139	32.231	0.162743	47.0439	3.31674	40.4684	53.3868	0.251572	21.708	1.25191	19.3093	24.105	0.159617	7.3585	3.51773	1.64054	14.514	0.129097	104.102	5.43157	93.5533	114.58	0.188591
Chiayi City	18.8502	1.59528	15.6708	21.73	0.227111	38.609	2.70294	33.0776	43.7153	0.335731	18.2573	0.934249	16.3039	19.9846	0.22265	12.9925	4.73508	4.13435	22.1474	0.185607	88.709	5.83062	77.9663	100.399	0.253454
New Taipei City	181.195	14.4679	154.412	209.01	0.146479	337.652	21.8019	291.22	379.045	0.23497	183.888	10.273	164.935	204.735	0.138574	73.6897	31.1597	25.8029	141.265	0.111651	776.425	44.1894	695.668	869.469	0.166579
Taoyuan City	80.1744	6.94534	65.837	94.0569	0.149579	219.014	14.8672	188.252	249.174	0.237285	95.1656	5.7403	84.0775	106.474	0.146409	42.7256	19.774	10.7696	82.1602	0.120694	437.08	27.6855	384.339	492.606	0.177458
Hsinchu County	32.5923	2.80174	26.8082	37.9599	0.15089	76.7227	5.43284	66.0637	87.5121	0.242027	19.7584	1.34985	17.2114	22.3869	0.145282	12.2329	5.62076	3.18697	23.6024	0.117624	141.306	8.66851	125.828	159.461	0.182802
Miaoli County	24.3304	2.11009	20.3396	28.2967	0.105784	55.0818	3.61591	48.0078	61.9487	0.177112	24.3118	1.53045	21.3116	27.1333	0.105704	12.2375	5.42285	3.65949	23.4654	0.0867907	115.962	7.18151	102.417	130.641	0.127151
Changhua County	41.3741	3.70887	34.0514	48.28	0.147239	96.1507	6.58324	82.9892	109.902	0.232248	31.1453	1.77398	27.7558	34.8151	0.148311	25.0756	10.8215	6.66077	47.4831	0.126008	193.746	13.246	168.215	220.783	0.175494
Nantou County	99.6974	8.69986	81.2423	116.458	0.179959	183.104	12.6096	158.936	206.338	0.288808	98.3147	6.04718	86.597	110.732	0.182064	54.4799	22.3029	16.7901	97.7449	0.147642	435.596	28.0764	383.293	490.323	0.207723
Yunlin County	44.3845	3.52753	37.2155	51.1232	0.192976	97.3742	6.26276	84.9427	109.551	0.300538	41.4923	2.27405	36.8063	46.1201	0.188601	33.8332	13.5672	10.2652	60.5642	0.15449	217.084	15.4399	186.793	247.197	0.218615
Chiayi County	71.9546	6.30974	59.7968	84.4132	0.181704	135.198	9.02386	116.641	153.111	0.292637	76.4295	5.14091	65.8898	87.0746	0.181543	33.8602	12.9037	10.359	60.0837	0.145949	317.443	19.4326	279.941	357.062	0.210088
Pingtung County	53.1684	4.65449	44.1938	61.6794	0.187874	106.5	7.79316	91.1886	121.227	0.287838	60.7144	3.46815	53.8785	67.641	0.190327	32.0664	12.4254	10.2111	56.7584	0.155662	252.449	16.1398	221.602	284.244	0.214303
Ilan County	76.1398	9.25416	58.4624	95.5783	0.177069	160.087	16.044	129.021	190.292	0.281348	60.5592	6.54788	48.1369	74.1747	0.171556	36.8983	13.6251	13.6648	65.0078	0.136156	333.684	33.0501	265.189	400.366	0.205597
Hualien County	16.0221	1.47402	13.1321	18.9154	0.111265	51.5597	3.2237	44.9878	57.9698	0.194565	17.5096	1.06006	15.4366	19.5427	0.108756	8.60552	3.69907	2.28399	15.5851	0.0896409	93.697	5.32861	83.7009	104.227	0.140686
Taitung County	17.0052	1.31901	14.4355	19.6216	0.0934353	18.968	1.21502	16.6221	21.3226	0.131722	8.22485	0.545005	7.15987	9.33369	0.0754573	4.37488	1.91494	1.1911	8.53854	0.0616181	48.5729	2.73592	43.3979	53.9622	0.0959939

## Sheet: PMD_PM25
City	Mean_IHD	SD_IHD	LCL_IHD	HCL_IHD	PAF_IHD	Mean_St	SD_St	LCL_St	HCL_St	PAF_St	Mean_LC	SD_LC	LCL_LC	HCL_LC	PAF_LC	Mean_COPD	SD_COPD	LCL_COPD	HCL_COPD	PAF_COPD	Mean_AD	SD_AD	LCL_AD	HCL_CAD	PAF_AD
Taipei City	57.3112	5.47443	46.8441	67.7499	0.2069	89.0949	5.85107	78.0744	100.538	0.340057	49.6548	3.415	42.8021	56.5589	0.139089	4.86866	1.81282	1.76608	8.61038	0.113225	200.93	10.0002	182.375	220.922	0.213982
Taichung City	61.9899	5.45067	51.7885	72.8782	0.262669	127.026	7.08581	112.541	140.431	0.419227	71.1091	4.2027	62.5845	78.8687	0.178218	7.83662	2.27125	3.55603	12.4324	0.145123	267.961	10.5652	247.716	287.749	0.270122
Tainan City	51.8166	4.05673	43.4638	59.3395	0.291105	119.34	7.04843	104.708	132.367	0.445298	62.8722	3.79061	55.4344	69.8811	0.196476	7.02302	2.66578	2.28382	12.5917	0.156067	241.052	9.28551	222.292	258.545	0.297228
Kaohsiung City	101.964	7.91197	85.9588	116.9	0.318636	181.472	9.71193	162.201	199.078	0.491793	110.542	6.6157	96.2409	122.757	0.221526	16.319	5.31424	6.75179	26.8578	0.17933	410.296	15.3865	378.903	439.365	0.320794
Keelung City	9.5273	0.839143	7.82548	11.0886	0.176431	17.343	1.12751	15.0603	19.5166	0.304263	7.63575	0.475326	6.64071	8.53611	0.117473	0.991583	0.364978	0.311225	1.73838	0.0991583	35.4976	1.5248	32.4962	38.521	0.190847
Hsinchu City	10.9103	0.993673	8.83169	12.8098	0.242452	16.4039	1.17086	13.9833	18.5145	0.372816	9.10188	0.527774	8.074	10.1383	0.159682	0.131708	0.0955589	0	0.335347	0.131708	36.5478	1.65919	33.0749	39.6828	0.248625
Chiayi City	8.18983	0.772508	6.75156	9.6832	0.314994	12.8711	0.775697	11.3846	14.3101	0.495042	8.26717	0.529607	7.13847	9.24213	0.223437	2.01168	0.663543	0.830199	3.32028	0.18288	31.3398	1.39935	28.7908	33.988	0.313398
New Taipei City	83.1721	7.63718	68.245	98.4985	0.20793	150.446	9.19821	131.327	167.07	0.342702	87.7842	5.61082	76.6284	98.9698	0.138899	9.57155	3.12139	3.73396	15.6626	0.11532	330.974	13.952	303.615	357.979	0.212982
Taoyuan City	34.3867	2.95757	28.4476	40.512	0.216269	90.2303	5.40788	79.6113	100.463	0.352462	39.3662	2.38847	34.5842	44.1406	0.145801	3.38185	0.993525	1.55089	5.32162	0.12078	167.365	6.92633	153.093	180.48	0.234734
Hsinchu County	13.0545	1.13085	10.7979	15.3306	0.229026	32.1632	1.90453	28.3871	35.974	0.365491	6.55219	0.454766	5.59049	7.43909	0.145604	0.481196	0.223526	0.0855182	0.955379	0.120299	52.2511	2.45387	47.2914	57.0914	0.269335
Miaoli County	8.26075	0.759352	6.74132	9.66412	0.165215	21.778	1.40421	19.1583	24.4413	0.268865	8.00616	0.472837	7.02177	8.93115	0.105344	0.947493	0.41434	0.199939	1.80681	0.0861357	38.9924	1.74042	35.7649	42.4428	0.178864
Changhua County	15.2986	1.59118	12.0632	18.3853	0.221719	30.1975	1.83628	26.486	33.5968	0.355264	12.3335	0.752454	10.8035	13.7697	0.148596	1.20708	0.550122	0.237367	2.27207	0.120708	59.0366	2.56351	53.9607	63.9899	0.239015
Nantou County	35.2069	3.11395	29.0598	41.6087	0.266719	67.9991	4.26796	59.5484	75.9436	0.419747	32.8133	2.18459	28.4012	37.0384	0.182296	3.90315	1.52073	1.27019	6.93121	0.150121	139.922	6.14033	126.984	151.284	0.279845
Yunlin County	17.5984	1.60531	14.2806	20.6383	0.270745	39.3207	2.50991	34.6757	44.2213	0.422804	17.3303	1.16621	14.7866	19.4207	0.188373	2.93336	0.960789	1.27073	4.9552	0.154387	77.1828	3.46844	70.7812	83.9832	0.286925
Chiayi County	25.7793	2.27351	21.4327	30.3625	0.268534	50.1974	3.01448	44.3059	55.9554	0.421827	27.6996	2.07211	23.7563	31.6926	0.182234	2.34438	0.890939	0.729476	4.23329	0.146523	106.021	4.87964	96.1695	115.866	0.276816
Pingtung County	18.2594	1.52117	15.2878	21.0939	0.280914	28.3709	1.73221	24.7753	31.7252	0.443296	21.7199	1.47419	18.7678	24.6439	0.190525	3.6292	1.33293	1.26562	6.37014	0.157791	71.9794	3.10075	65.5834	78.0526	0.270599
Ilan County	31.6958	3.875	24.3772	39.7521	0.255611	66.6452	6.36325	53.2588	78.6574	0.40391	26.0019	2.84541	20.6831	31.603	0.171065	6.7342	2.2884	2.7246	11.459	0.140296	131.077	12.0735	107.01	154.965	0.268051
Hualien County	6.6978	0.689672	5.35593	8.00926	0.167445	26.0563	1.74053	22.5436	29.4132	0.28322	7.38582	0.476266	6.42641	8.29264	0.108615	0.887096	0.342938	0.294855	1.61761	0.0887096	41.027	1.96047	37.0604	44.8525	0.195367
Taitung County	11.4543	1.07053	9.35204	13.4936	0.123165	7.83567	0.544636	6.6926	8.89145	0.200915	2.78839	0.204803	2.39918	3.193	0.075362	0.192347	0.108117	0.0138007	0.417732	0.0641156	22.2707	1.21867	19.9678	24.6865	0.129481

## Sheet: AD_CP
City	NO_TOWN	NO_SITE	IHD_DeCP_m	Stroke_DeCP_m	COPD_DeCP_m	Lung_DeCP_m	all_DeCP_m	IHD_DeCHP_m	Stroke_DeCHP_m	COPD_DeCHP_m	Lung_DeCHP_m	all_DeCHP_m	IHD_DeCoal_m	Stroke_DeCoal_m	COPD_DeCoal_m	Lung_DeCoal_m	all_DeCoal_m	IHD_DeCP_STD	Stroke_DeCP_STD	COPD_DeCP_STD	Lung_DeCP_STD	all_DeCP_STD	IHD_DeCHP_STD	Stroke_DeCHP_STD	COPD_DeCHP_STD	Lung_DeCHP_STD	all_DeCHP_STD	IHD_DeCoal_STD	Stroke_DeCoal_STD	COPD_DeCoal_STD	Lung_DeCoal_STD	all_DeCoal_STD	IHD_DeCPpct25	Stroke_DeCPpct25	COPD_DeCPpct25	Lung_DeCPpct25	all_DeCPpct25	IHD_DeCHPpct25	Stroke_DeCHPpct25	COPD_DeCHPpct25	Lung_DeCHPpct25	all_DeCHPpct25	IHD_DeCoalpct25	Stroke_DeCoalpct25	COPD_DeCoalpct25	Lung_DeCoalpct25	all_DeCoalpct25	IHD_DeCPpct975	Stroke_DeCPpct975
Taipei City	12	6	3.0173	5.17792	1.24485	2.90604	12.3461	1.36387	2.33895	0.562379	1.31291	5.57811	4.4114	7.57637	1.81942	4.24333	18.0505	0.407813	0.64171	0.574527	0.355492	1.49847	0.136452	0.19641	0.25163	0.0944885	0.427518	0.523526	0.809796	0.821879	0.385321	1.78689	2.23412	3.93754	0.297321	2.21817	9.59771	1.10155	1.9621	0.135203	1.12612	4.76779	3.41526	5.96436	0.428207	3.53017	14.5378	3.83867	6.44358
Taichung City	29	5	4.64168	9.25649	2.53596	5.09886	21.533	2.36241	4.70594	1.28715	2.59771	10.9532	7.04811	14.088	3.85576	7.7443	32.7361	0.529849	0.913442	1.11022	0.472932	2.16898	0.411127	0.782614	0.584321	0.426936	1.80727	0.739002	1.34975	1.68143	0.683723	3.13878	3.61123	7.49158	0.643351	4.16848	17.6305	1.54998	3.17241	0.317915	1.75681	7.45472	5.6234	11.3434	0.944477	6.4405	26.56	5.69437	11.1719
Tainan City	37	4	5.13439	10.5858	3.0582	5.78575	24.5642	3.02255	6.22262	1.79801	3.40715	14.4503	8.16501	16.8627	4.86026	9.19607	39.084	0.564109	1.05103	1.18944	0.537069	2.42228	0.263509	0.453759	0.683887	0.219275	1.01984	0.795032	1.33602	1.87514	0.697008	3.14711	3.9861	8.55955	0.945905	4.73789	19.9236	2.4947	5.35882	0.566187	3.00598	12.4286	6.67562	14.1465	1.54681	7.84764	33.0643	6.23509	12.7563
Kaohsiung City	38	12	8.15861	12.9228	3.65704	7.79999	32.5384	6.22462	9.85278	2.78765	5.95345	24.8185	14.4669	22.9809	6.4889	13.8232	57.76	0.63643	0.741338	1.25248	0.408745	1.84233	0.53695	0.707384	0.955215	0.404049	1.70625	1.11988	1.29642	2.235	0.735679	3.28525	6.92648	11.4283	1.33346	7.00806	29.0771	5.12881	8.43427	1.01966	5.20345	21.4725	12.3199	20.4595	2.35101	12.4449	51.5603	9.38453	14.3413
Keelung City	7	1	0.705854	1.31011	0.277699	0.595264	2.88893	0.260225	0.482148	0.102123	0.219501	1.064	0.963609	1.7896	0.378636	0.812506	3.94435	0.087599	0.149854	0.105621	0.0654007	0.315924	0.0325548	0.0544445	0.038346	0.0242654	0.114706	0.119822	0.204539	0.142108	0.0898232	0.428709	0.548301	1.0146	0.0933833	0.475178	2.27255	0.1963	0.378323	0.0341688	0.173262	0.843922	0.741652	1.38679	0.130109	0.636609	3.07405	0.887543	1.61812
Hsinchu City	3	1	0.708118	1.11698	0.187866	0.559553	2.57252	0.448661	0.707015	0.119263	0.354472	1.62941	1.16076	1.83277	0.30868	0.916844	4.21905	0.0878561	0.130839	0.0845638	0.062544	0.277186	0.0562205	0.0811514	0.0541961	0.0389743	0.175558	0.148678	0.221072	0.141405	0.105856	0.477406	0.542381	0.866584	0.0494951	0.439464	2.0498	0.343666	0.549905	0.0291142	0.278376	1.2963	0.87562	1.41812	0.0787061	0.716504	3.31147	0.896189	1.3776
Chiayi City	2	1	0.610675	1.1427	0.405678	0.607888	2.76694	0.404865	0.757311	0.268878	0.403159	1.83421	1.01912	1.91177	0.676494	1.01373	4.62111	0.0779251	0.134015	0.141612	0.06869	0.326118	0.0505542	0.0907841	0.0927565	0.0446939	0.214349	0.128635	0.226486	0.233867	0.110125	0.532812	0.459449	0.892893	0.142587	0.479414	2.16193	0.305535	0.590227	0.097176	0.315139	1.40921	0.775363	1.47867	0.247157	0.806763	3.61127	0.765404	1.4298
New Taipei City	29	11	5.3865	9.35934	2.24606	5.5696	22.5615	2.50394	4.34741	1.04592	2.59034	10.4876	7.93026	13.7942	3.30871	8.19885	33.232	0.768883	1.22681	0.915048	0.725569	2.91033	0.214663	0.30935	0.413247	0.171247	0.705292	0.882339	1.34746	1.32143	0.78407	3.15383	3.99516	6.95921	0.753863	4.17819	16.9089	2.0674	3.76566	0.368004	2.27017	9.22032	6.25158	11.2998	1.12168	6.66201	27.3721	7.00524	11.9971
Taoyuan City	13	6	2.63887	6.8094	1.43448	3.19674	14.0795	1.59495	4.11001	0.867278	1.93178	8.50401	4.25699	10.9897	2.31423	5.15055	22.7115	0.401097	0.983935	0.637913	0.449253	1.9779	0.153868	0.332599	0.371738	0.141884	0.639889	0.512846	1.13778	1.00953	0.502776	2.27627	1.9221	4.83286	0.370908	2.33681	10.2629	1.30681	3.46588	0.22903	1.66589	7.24344	3.29467	8.98125	0.596497	4.16633	18.5176	3.43982	8.72031
Hsinchu County	13	2	0.852586	1.87053	0.313731	0.525454	3.5623	0.561751	1.23215	0.206956	0.346514	2.34737	1.41709	3.1141	0.521745	0.873466	5.92639	0.0975741	0.184226	0.137305	0.052589	0.342326	0.0553073	0.104182	0.0901919	0.0310809	0.192293	0.136049	0.252014	0.226184	0.0734683	0.454714	0.66802	1.51385	0.0829673	0.419317	2.89943	0.458238	1.04245	0.0549587	0.284825	2.00106	1.1678	2.63971	0.144644	0.734678	5.04782	1.04163	2.21725
Miaoli County	18	3	0.487326	1.0458	0.245733	0.489106	2.26797	0.21835	0.467629	0.110408	0.218871	1.01526	0.70926	1.52074	0.356635	0.71215	3.29878	0.120107	0.25371	0.119535	0.116228	0.545359	0.110609	0.234272	0.0747124	0.10936	0.50815	0.172012	0.351139	0.172544	0.166846	0.765682	0.2637	0.563372	0.0597388	0.26169	1.21852	-0.00294632	-0.00617872	-0.00117327	-0.00282001	-0.0140063	0.387676	0.825109	0.0873323	0.381915	1.79347	0.740994	1.56237
Changhua County	26	3	3.01145	6.64405	1.72045	2.29751	13.6735	2.04636	4.51869	1.17489	1.5652	9.30514	5.12045	11.3334	2.95225	3.90832	23.3145	1.02794	2.21833	0.892142	0.753183	4.50461	0.800021	1.76281	0.672807	0.600159	3.59525	1.38627	3.02035	1.44119	1.01614	6.14302	1.10274	2.35411	0.34962	0.836067	4.99677	0.448286	1.02319	0.19576	0.349252	2.05964	2.49817	5.44607	0.700814	1.908	11.0633	5.02956	10.9344
Nantou County	13	3	3.80491	6.44967	2.05769	3.8327	16.145	1.38656	2.34565	0.749324	1.39745	5.87899	5.2102	8.84576	2.81804	5.24907	22.1231	0.417988	0.586147	0.826087	0.332663	1.4816	0.134367	0.181458	0.296237	0.101362	0.453374	0.501182	0.689269	1.12069	0.387556	1.72375	3.02361	5.35484	0.598331	3.22941	13.3101	1.11365	1.99984	0.213146	1.20011	4.99624	4.25976	7.44533	0.815224	4.53512	18.8262	4.63988	7.5964
Yunlin County	20	4	4.65338	9.40121	3.4389	4.40342	21.8969	1.51938	3.04889	1.12058	1.44178	7.13063	6.08807	12.347	4.50277	5.76445	28.7023	1.51035	3.00893	1.74865	1.38788	7.05513	0.222627	0.422285	0.461042	0.198099	1.04005	1.50704	3.07292	2.10123	1.39677	7.18195	1.67847	3.45466	0.772218	1.66991	8.1479	1.11056	2.27766	0.378728	1.06435	5.1683	3.21439	6.5366	1.18757	3.02341	14.4929	7.8932	15.5618
Chiayi County	18	2	3.71141	6.38784	1.74548	4.01272	15.8574	1.9234	3.30111	0.907811	2.07893	8.21126	5.65448	9.74491	2.67013	6.10607	24.1756	0.815914	1.38114	0.725477	0.856284	3.32865	0.218927	0.332043	0.336996	0.19048	0.767599	0.943074	1.50559	1.05707	0.922397	3.65891	2.14007	3.89028	0.541101	2.38475	9.58246	1.48392	2.65801	0.270588	1.71274	6.64352	3.8815	6.82203	0.784813	4.27435	17.0083	5.3491	8.97837
Pingtung County	33	3	1.99923	3.71595	1.17514	2.32149	9.21181	1.26196	2.34179	0.741222	1.46471	5.80968	3.27509	6.1	1.92297	3.80086	15.0989	0.177843	0.26904	0.419235	0.148914	0.615877	0.186223	0.314782	0.277384	0.189449	0.767066	0.318006	0.510941	0.684305	0.273557	1.13149	1.64407	3.20178	0.425726	2.04026	8.02843	0.901615	1.68703	0.251731	1.09593	4.32003	2.66577	5.08327	0.69043	3.25896	13.0295	2.35554	4.23581
Ilan County	12	2	2.37249	4.59099	1.16892	1.91333	10.0457	1.47213	2.84788	0.722667	1.18718	6.22986	3.84775	7.46971	1.89197	3.10209	16.3115	0.608915	1.14533	0.49449	0.475844	2.50931	0.189001	0.340984	0.248142	0.130239	0.708049	0.685433	1.32325	0.701451	0.520722	2.79571	1.16662	2.31423	0.377638	0.942817	4.99946	1.10618	2.2122	0.288768	0.942632	4.87132	2.55935	5.06542	0.71708	2.1363	11.1198	3.61916	6.92363
Hualien County	13	1	0.541971	1.64377	0.289083	0.596332	3.07115	0.0222215	0.067254	0.011868	0.0244504	0.125794	0.571324	1.73388	0.304952	0.629001	3.23915	0.0762603	0.200084	0.12027	0.0730413	0.365284	0.00304391	0.00771334	0.0049157	0.00273679	0.0141683	0.076246	0.201446	0.124932	0.0741633	0.364221	0.397868	1.2733	0.0827969	0.462313	2.37057	0.0166369	0.0529907	0.00328231	0.0189736	0.0999274	0.435497	1.36196	0.0849724	0.495241	2.52519	0.700492	2.07061
Taitung County	16	1	0.218716	0.238817	0.057375	0.107919	0.622827	0.151155	0.165213	0.0397701	0.0746269	0.430765	0.36675	0.400719	0.0961688	0.180948	1.04458	0.0277178	0.0277411	0.0249709	0.0128174	0.0713291	0.0180355	0.0192797	0.0174938	0.00857447	0.0486065	0.0466879	0.0480348	0.041825	0.0217933	0.121318	0.166612	0.185136	0.016617	0.0838877	0.491526	0.117959	0.128666	0.0108728	0.0586226	0.341602	0.279939	0.309712	0.0278276	0.139616	0.817894	0.278337	0.297183
[truncated: 13 more columns]

## Sheet: PMD_CP
City	NO_TOWN	NO_SITE	IHD_DeCP_m	Stroke_DeCP_m	COPD_DeCP_m	Lung_DeCP_m	all_DeCP_m	IHD_DeCHP_m	Stroke_DeCHP_m	COPD_DeCHP_m	Lung_DeCHP_m	all_DeCHP_m	IHD_DeCoal_m	Stroke_DeCoal_m	COPD_DeCoal_m	Lung_DeCoal_m	all_DeCoal_m	IHD_DeCP_STD	Stroke_DeCP_STD	COPD_DeCP_STD	Lung_DeCP_STD	all_DeCP_STD	IHD_DeCHP_STD	Stroke_DeCHP_STD	COPD_DeCHP_STD	Lung_DeCHP_STD	all_DeCHP_STD	IHD_DeCoal_STD	Stroke_DeCoal_STD	COPD_DeCoal_STD	Lung_DeCoal_STD	all_DeCoal_STD	IHD_DeCPpct25	Stroke_DeCPpct25	COPD_DeCPpct25	Lung_DeCPpct25	all_DeCPpct25	IHD_DeCHPpct25	Stroke_DeCHPpct25	COPD_DeCHPpct25	Lung_DeCHPpct25	all_DeCHPpct25	IHD_DeCoalpct25	Stroke_DeCoalpct25	COPD_DeCoalpct25	Lung_DeCoalpct25	all_DeCoalpct25	IHD_DeCPpct975	Stroke_DeCPpct975
Taipei City	12	6	1.1537	1.61163	0.101199	1.04855	3.91509	0.521034	0.726849	0.045813	0.473636	1.76733	1.68683	2.35793	0.148074	1.53129	5.72412	0.152304	0.191606	0.0362594	0.129792	0.446663	0.0470848	0.0485775	0.0159304	0.0342411	0.104403	0.186923	0.215176	0.0523159	0.144694	0.490247	0.873696	1.24946	0.0365145	0.808703	3.04983	0.426289	0.632737	0.0174947	0.405955	1.56227	1.30625	1.93718	0.0558003	1.2573	4.80986	1.44761	1.99406
Taichung City	29	5	1.9124	3.41845	0.249531	2.34226	7.92263	0.97274	1.73528	0.126959	1.19314	4.02812	2.90688	5.21001	0.378424	3.55629	12.0516	0.215484	0.315797	0.0735684	0.234335	0.712581	0.16923	0.282867	0.0407763	0.200247	0.648928	0.302598	0.449476	0.108325	0.326811	0.975882	1.50752	2.78962	0.107498	1.89977	6.53377	0.644924	1.16589	0.0523786	0.805357	2.73358	2.31076	4.36429	0.170636	2.93352	10.1044	2.33497	4.05743
Tainan City	37	4	1.81763	3.66379	0.266922	2.3905	8.13884	1.06887	2.15022	0.1572	1.40774	4.78403	2.89442	5.85232	0.424979	3.79921	12.9709	0.189845	0.321662	0.0933598	0.227488	0.690858	0.0849064	0.12611	0.0538802	0.0952449	0.254241	0.257872	0.401177	0.147569	0.293922	0.84338	1.44664	3.05436	0.0874656	1.9624	6.82346	0.900205	1.90116	0.050208	1.22434	4.26936	2.39487	5.06764	0.131562	3.24835	11.3427	2.20553	4.29133
Kaohsiung City	38	12	3.11421	4.71513	0.525269	3.67432	12.0289	2.37455	3.59097	0.40024	2.80428	9.17004	5.53129	8.41138	0.931761	6.51146	21.3859	0.2337	0.208621	0.153237	0.212768	0.516252	0.197411	0.213934	0.116061	0.199665	0.526128	0.405923	0.352816	0.27205	0.378075	0.880127	2.6126	4.28225	0.236955	3.26597	11.0062	1.97237	3.16347	0.184292	2.40337	8.12347	4.68442	7.66646	0.422694	5.7512	19.7504	3.54896	5.10082
Keelung City	7	1	0.311123	0.519125	0.0318987	0.261784	1.12393	0.114655	0.190841	0.0117298	0.0965348	0.413761	0.424912	0.709722	0.0435688	0.357396	1.5356	0.0391974	0.0579033	0.0122202	0.0294658	0.117668	0.0148758	0.0212561	0.00443113	0.0110097	0.0436982	0.0541561	0.0791127	0.0167795	0.0414644	0.162985	0.234136	0.417493	0.010175	0.204354	0.905653	0.0870623	0.149987	0.00381611	0.075799	0.327215	0.322749	0.555124	0.0138749	0.280348	1.21412	0.388467	0.637365
Hsinchu City	3	1	0.262543	0.356294	0.00327873	0.234321	0.856437	0.166325	0.225386	0.00207752	0.148419	0.542208	0.430838	0.585468	0.00536436	0.383881	1.40555	0.0322387	0.0400036	0.00230139	0.026653	0.0895915	0.021152	0.0252098	0.00146578	0.0164073	0.0569825	0.0553068	0.0674886	0.00375892	0.0447099	0.152671	0.200538	0.278397	0	0.183046	0.680312	0.126463	0.176334	0	0.116133	0.430211	0.327061	0.456344	0	0.299228	1.10873	0.328066	0.44167
Chiayi City	2	1	0.250344	0.332548	0.0637841	0.274206	0.920882	0.165921	0.220004	0.0421747	0.181871	0.60997	0.418634	0.558288	0.106462	0.45719	1.54057	0.0303302	0.0354477	0.0207001	0.0322496	0.0991105	0.0201299	0.0238413	0.0132341	0.0212085	0.0647423	0.0523829	0.0616399	0.0342812	0.0514931	0.166526	0.192345	0.261384	0.0250502	0.213806	0.734378	0.12668	0.172856	0.0159914	0.140311	0.483157	0.320162	0.440308	0.0403899	0.360182	1.22275	0.311017	0.403054
New Taipei City	29	11	2.39166	3.89496	0.277485	2.65723	9.22133	1.11157	1.80678	0.129058	1.23608	4.28348	3.52454	5.74629	0.408348	3.91163	13.5908	0.341339	0.503763	0.0957216	0.354339	1.15181	0.10066	0.115735	0.0419595	0.0930096	0.247551	0.408852	0.54341	0.134783	0.392481	1.21899	1.76732	2.90763	0.103758	1.98655	7.02177	0.895426	1.57634	0.050842	1.06324	3.80314	2.74966	4.6979	0.158256	3.17335	11.2578	3.05106	4.95117
Taoyuan City	13	6	1.09501	2.59848	0.109453	1.33107	5.13402	0.661415	1.56679	0.0660867	0.80442	3.09871	1.76686	4.20117	0.176242	2.14513	8.2894	0.164392	0.355875	0.0342538	0.183892	0.679288	0.0624558	0.104186	0.0187421	0.05694	0.18005	0.202727	0.393314	0.0509824	0.209053	0.725912	0.788625	1.9141	0.0475585	0.973723	3.85042	0.549777	1.36415	0.030766	0.691995	2.76174	1.38038	3.47335	0.0824773	1.75036	6.91531	1.42155	3.29227
Hsinchu County	13	2	0.325583	0.72176	0.0125216	0.174347	1.23421	0.214555	0.475207	0.00825767	0.114981	0.813	0.541846	1.20345	0.0208118	0.289778	2.05589	0.0348176	0.0655002	0.00553931	0.0172891	0.106452	0.0204971	0.0373215	0.00364946	0.0102284	0.0596537	0.0494445	0.0857017	0.00916697	0.0234571	0.134425	0.259788	0.594416	0.00228204	0.140925	1.02528	0.173619	0.406123	0.00149089	0.0950001	0.702483	0.448016	1.03382	0.00371472	0.244277	1.79584	0.394852	0.854242
Miaoli County	18	3	0.158472	0.39107	0.0185333	0.161602	0.729678	0.0707291	0.175006	0.00819115	0.0722443	0.32617	0.230429	0.569205	0.0269377	0.23508	1.06165	0.0397018	0.0932448	0.00933543	0.0383083	0.171983	0.0357771	0.0880682	0.00562196	0.0360848	0.162933	0.0562009	0.131418	0.0131827	0.0540686	0.242202	0.0824739	0.209025	0.0040091	0.0885641	0.394762	-0.00100828	-0.00240349	-8.24707e-05	-0.00092619	-0.00446229	0.122374	0.309221	0.00550655	0.125474	0.570843	0.239511	0.580019
Changhua County	26	3	1.06518	1.92402	0.0871766	0.908024	3.9844	0.724675	1.30713	0.0591152	0.619212	2.71013	1.81759	3.30206	0.147897	1.54336	6.81092	0.360484	0.63599	0.049632	0.298972	1.3068	0.28344	0.5073	0.0349133	0.239536	1.0413	0.496984	0.875927	0.0766016	0.401054	1.77506	0.411386	0.709613	0.01483	0.336837	1.49343	0.155229	0.287407	0.00665867	0.139819	0.595624	0.857667	1.63068	0.0291268	0.757086	3.33022	1.76457	3.14766
Nantou County	13	3	1.27949	2.17843	0.147053	1.27791	4.88288	0.465616	0.790089	0.0535677	0.465839	1.77511	1.75377	2.99223	0.201401	1.75006	6.69746	0.133479	0.180266	0.0542498	0.11643	0.379538	0.0426637	0.051907	0.0195498	0.0349743	0.105192	0.160533	0.20564	0.0736498	0.137557	0.412491	1.00652	1.83115	0.0494221	1.06229	4.15339	0.378219	0.691892	0.0183321	0.400096	1.58792	1.42692	2.57397	0.068404	1.49086	5.88564	1.54009	2.54563
Yunlin County	20	4	1.76275	3.48424	0.302675	1.85057	7.40024	0.573614	1.12112	0.0984556	0.606027	2.39922	2.31047	4.58814	0.394141	2.42094	9.71369	0.575646	1.12324	0.138956	0.579392	2.3491	0.0860936	0.152919	0.0336456	0.0847418	0.318345	0.575912	1.13687	0.155962	0.583837	2.33896	0.643278	1.2723	0.0754564	0.681485	2.7091	0.404397	0.82923	0.0394213	0.446889	1.77939	1.19102	2.38267	0.131519	1.30152	5.09385	3.00774	5.77423
Chiayi County	18	2	1.26666	2.16271	0.121011	1.45157	5.00194	0.655187	1.11445	0.0623862	0.752188	2.58421	1.93287	3.30888	0.183214	2.20985	7.63481	0.279394	0.461943	0.0499581	0.313433	1.05724	0.0704109	0.102563	0.0220608	0.0749575	0.225134	0.318517	0.500509	0.0682457	0.347893	1.13958	0.751618	1.30341	0.0350987	0.866821	2.97792	0.507365	0.922971	0.0207961	0.6135	2.15986	1.32741	2.32491	0.0575986	1.54906	5.37183	1.80328	3.05822
Pingtung County	33	3	0.646162	0.875926	0.134275	0.831501	2.48786	0.407268	0.551051	0.0847677	0.524895	1.56798	1.06011	1.44258	0.220172	1.36171	4.08457	0.0515466	0.0457186	0.0478083	0.0560883	0.126726	0.056122	0.06919	0.0321446	0.0706785	0.197037	0.0932698	0.0979429	0.0797884	0.106466	0.266868	0.540927	0.78757	0.0435883	0.721069	2.23762	0.300341	0.414476	0.0273428	0.387829	1.19349	0.877952	1.24138	0.072791	1.15456	3.58176	0.744281	0.966319
Ilan County	12	2	0.938691	1.75131	0.206687	0.823549	3.72024	0.581968	1.08468	0.127948	0.511152	2.30575	1.5232	2.85245	0.334659	1.33488	6.04519	0.243045	0.440254	0.0831827	0.205549	0.925784	0.0753918	0.130797	0.0417029	0.0584528	0.259228	0.27069	0.50128	0.117039	0.223422	1.0134	0.466527	0.893466	0.0687104	0.408266	1.85786	0.441362	0.83177	0.0515461	0.403644	1.8155	1.01418	1.90825	0.121587	0.916402	4.07124	1.42958	2.64432
Hualien County	13	1	0.219891	0.795124	0.0299274	0.251906	1.29685	0.00900381	0.0324812	0.00122999	0.0103316	0.0530466	0.231836	0.839007	0.0316459	0.265634	1.36812	0.032316	0.0931252	0.0115068	0.0317206	0.146906	0.00125891	0.0036217	0.000477789	0.00123128	0.00567907	0.0325747	0.0954822	0.0123436	0.0318353	0.148674	0.157207	0.623058	0.00899335	0.191785	1.01355	0.00663341	0.0256886	0.000368222	0.00795969	0.0425114	0.172854	0.666987	0.00941427	0.207229	1.09416	0.285451	0.987631
Taitung County	16	1	0.145572	0.0950083	0.00246574	0.0365442	0.27959	0.100585	0.0657063	0.00170675	0.025261	0.193259	0.244116	0.159476	0.0041179	0.061233	0.468944	0.0197546	0.0110428	0.00135686	0.00459718	0.0320748	0.0128672	0.00758561	0.000936781	0.00301065	0.0209876	0.0332036	0.0191584	0.0022339	0.00745119	0.0540804	0.106641	0.0736668	9.07752e-05	0.0280039	0.217229	0.0754701	0.051387	6.085e-05	0.0196667	0.152915	0.178846	0.122399	0.000152166	0.0476764	0.362339	0.185142	0.118555
[truncated: 13 more columns]
